# Supplementary material
Source: PubMed Central journal article supplement (PMC3262118)

## Supporting Information (SI) for

### Simultaneous Synthesis of both Rings of Chromenes via a Benzannulation/*o*-Quinone Methide Formation/Electrocyclization Cascade

Nilanjana Majumdar, Keith A. Korthals and William D. Wulff\*

*Department of Chemistry, Michigan State University, East Lansing, MI 48824*

E-Mail: wulff@chemistry.msu.edu

#### Table of Contents

|                     |     |
|---------------------|-----|
| Compound 15.....    | S3  |
| Compound 38.....    | S4  |
| Compound 66.....    | S5  |
| Compound 55.....    | S6  |
| Compound 17.....    | S7  |
| Compound 23.....    | S8  |
| Compound 24.....    | S9  |
| Compound 22.....    | S10 |
| Compound 25.....    | S11 |
| Compound 26.....    | S12 |
| Compound 27.....    | S13 |
| Compound 28.....    | S14 |
| Compound 39.....    | S15 |
| Compound 39 OD..... | S16 |
| Compound 29.....    | S17 |
| Compound 30.....    | S18 |
| Compound 31.....    | S19 |
| Compound 32.....    | S20 |

|                           |     |
|---------------------------|-----|
| Compound <b>33</b> .....  | S21 |
| Compound <b>34</b> .....  | S22 |
| Compound <b>35</b> .....  | S23 |
| Compound <b>36</b> .....  | S24 |
| Compound <b>46</b> .....  | S25 |
| Compound <b>54</b> .....  | S26 |
| Compound <b>57a</b> ..... | S27 |
| Compound <b>57b</b> ..... | S28 |
| Compound <b>21</b> .....  | S29 |
| Compound <b>62</b> .....  | S30 |
| Compound <b>63</b> .....  | S31 |
| Compound <b>64</b> .....  | S32 |
| Compound <b>65</b> .....  | S33 |

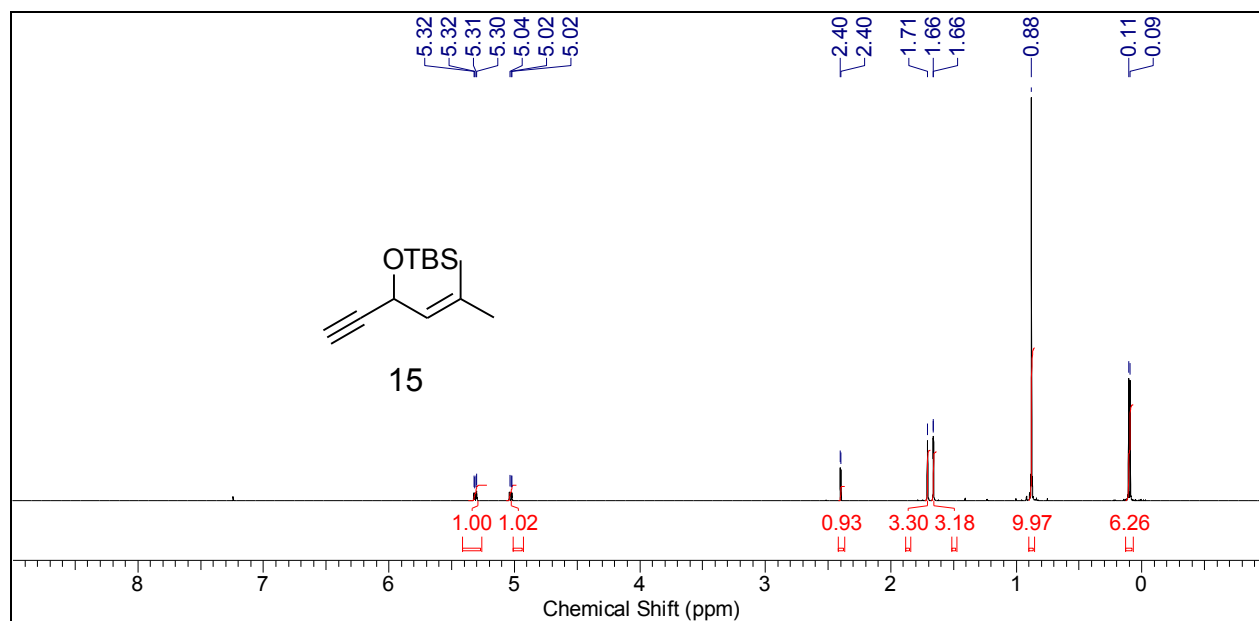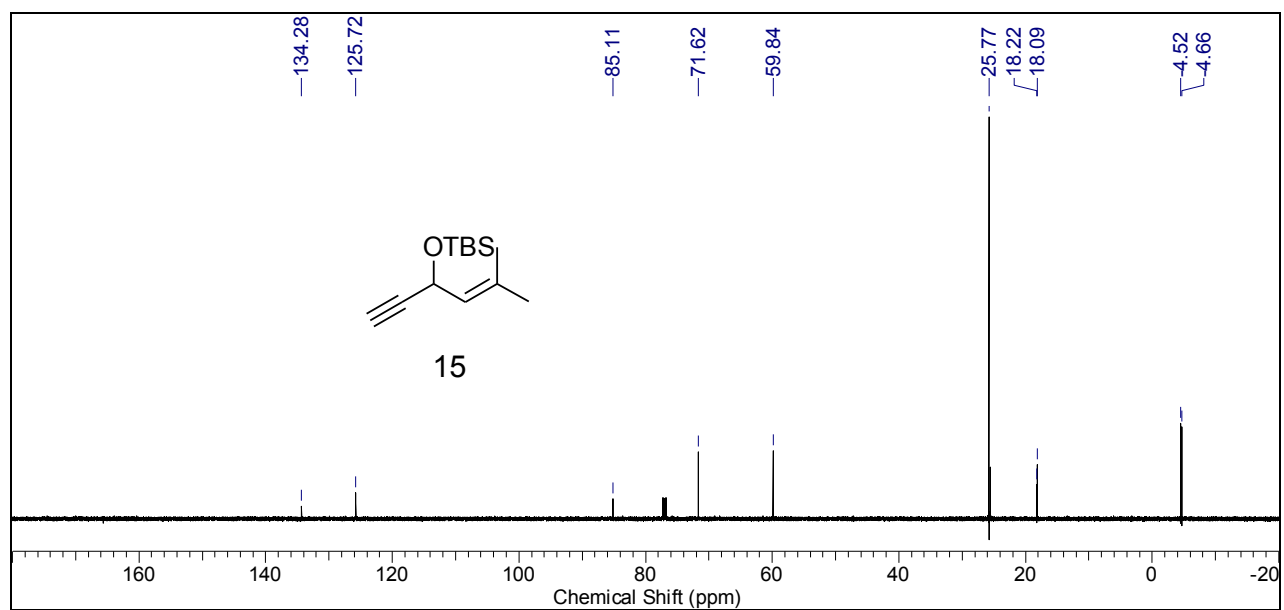

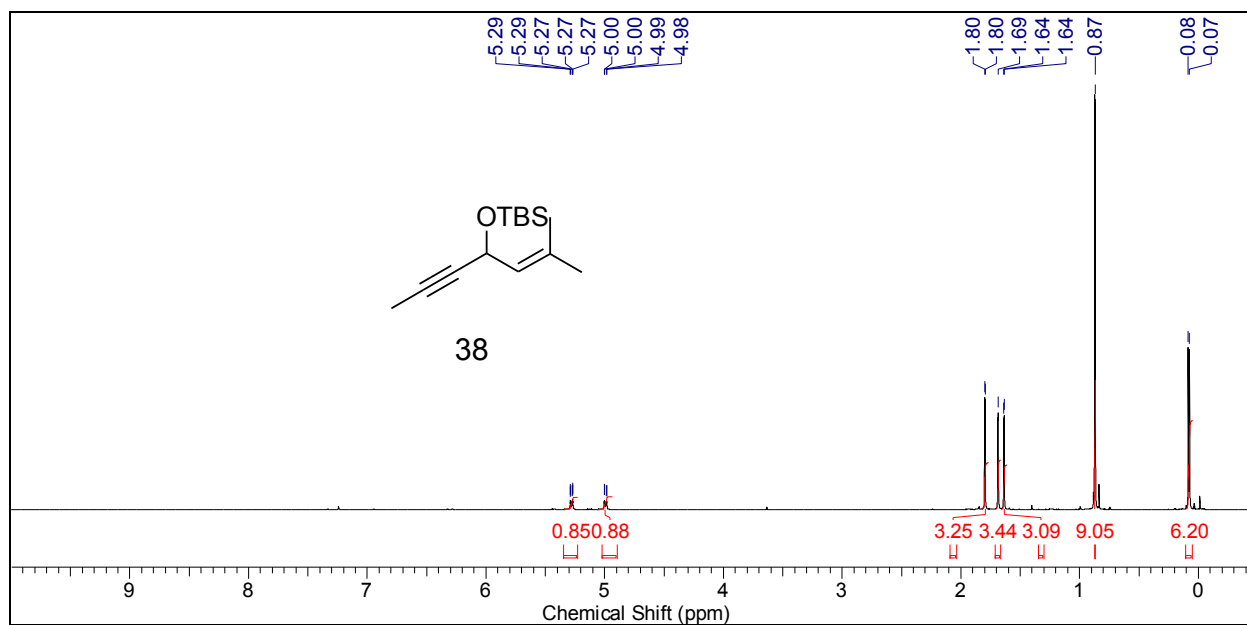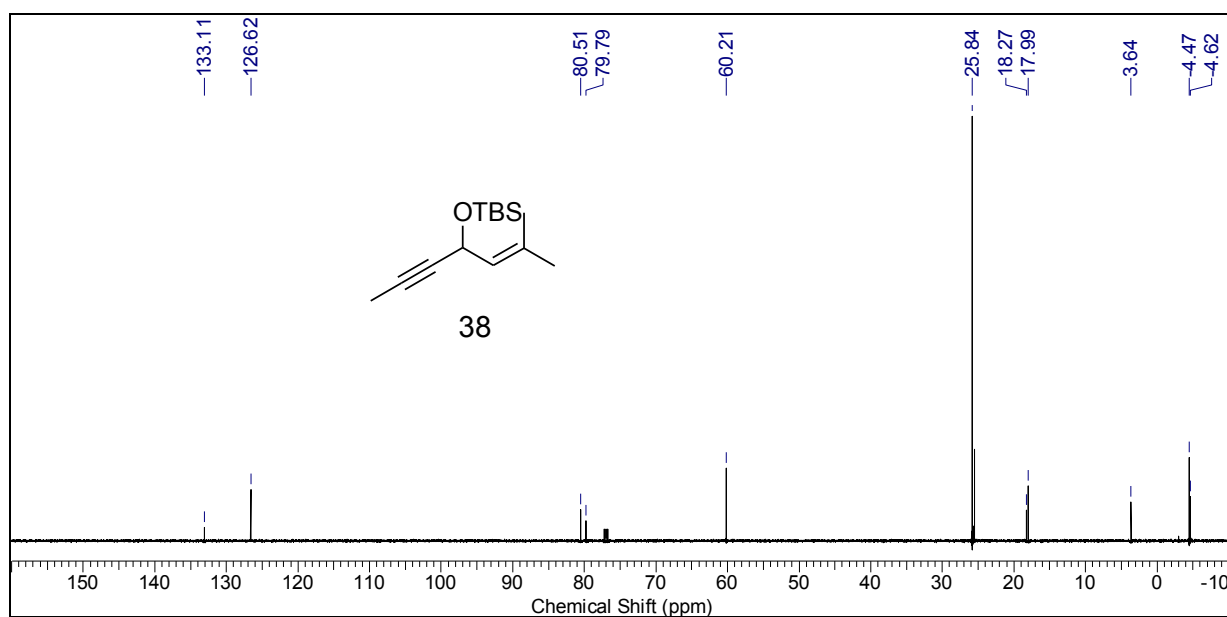

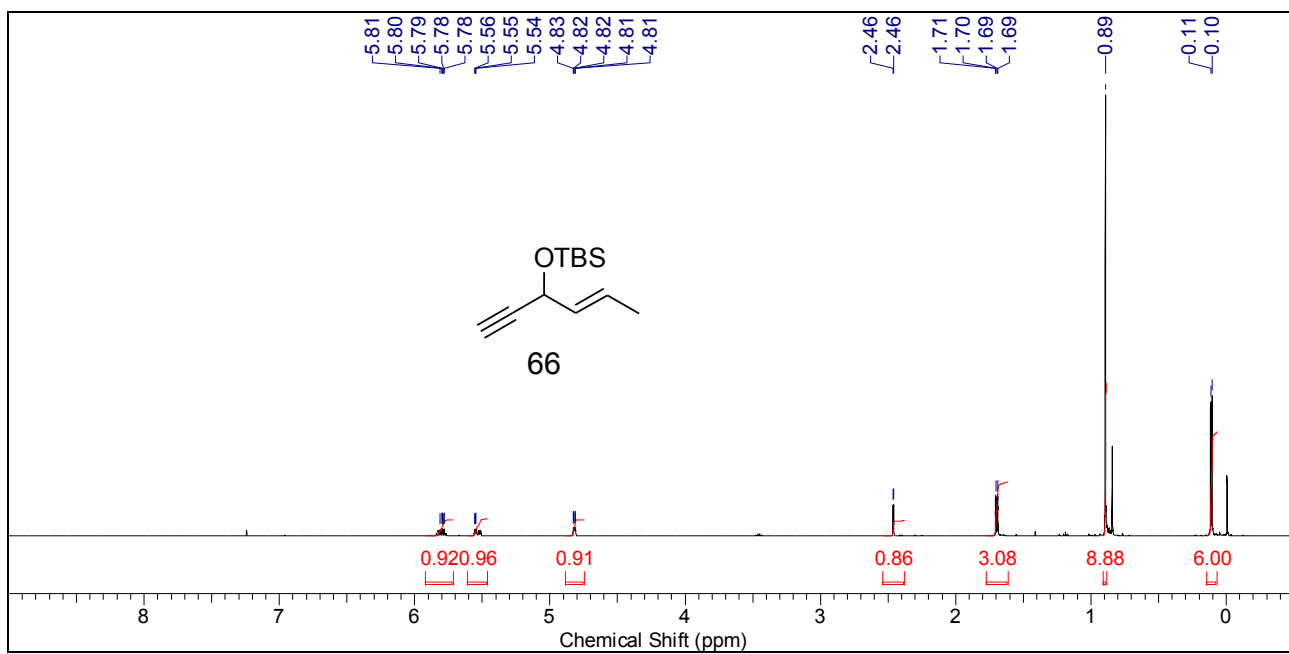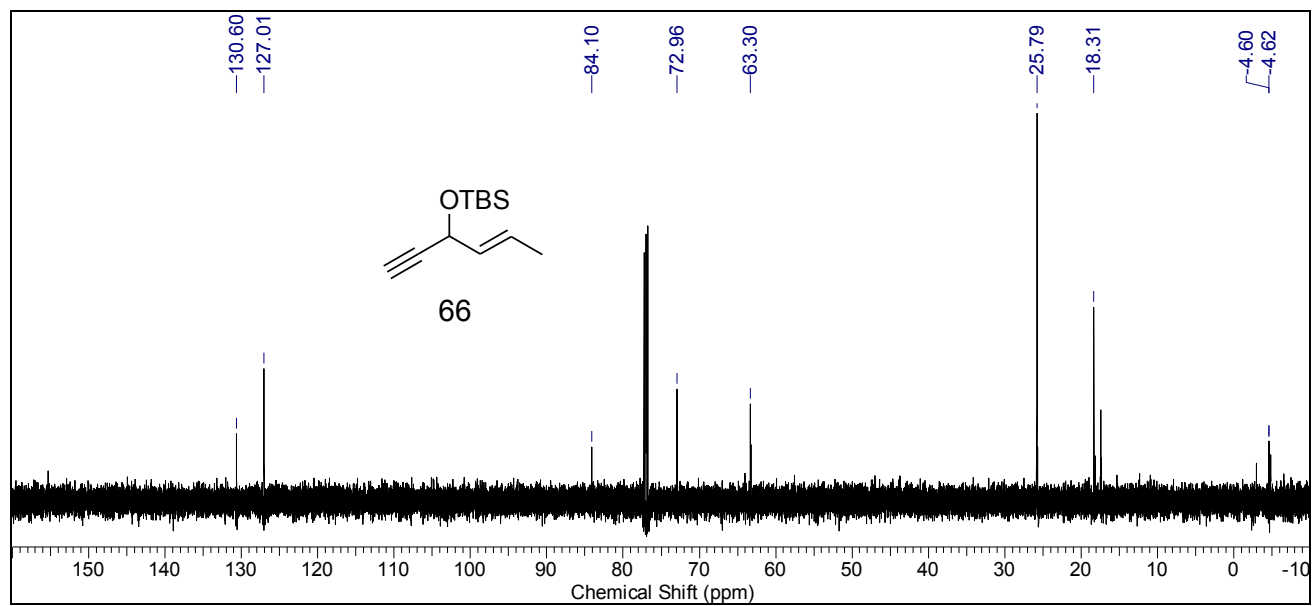

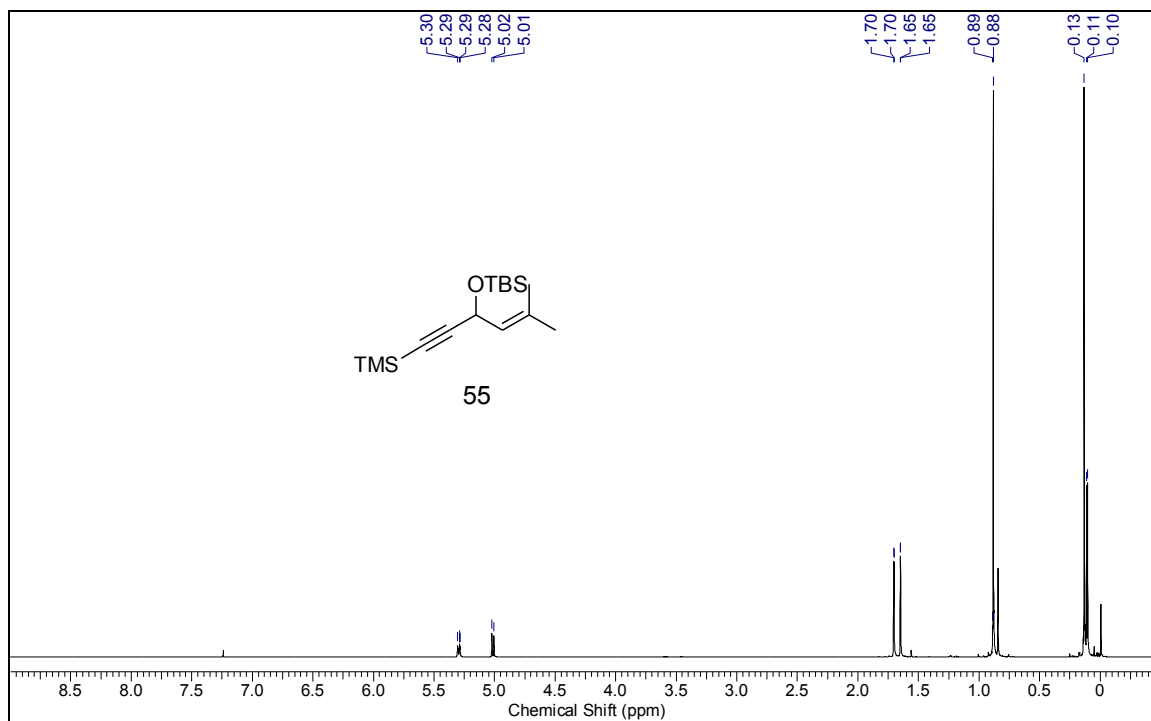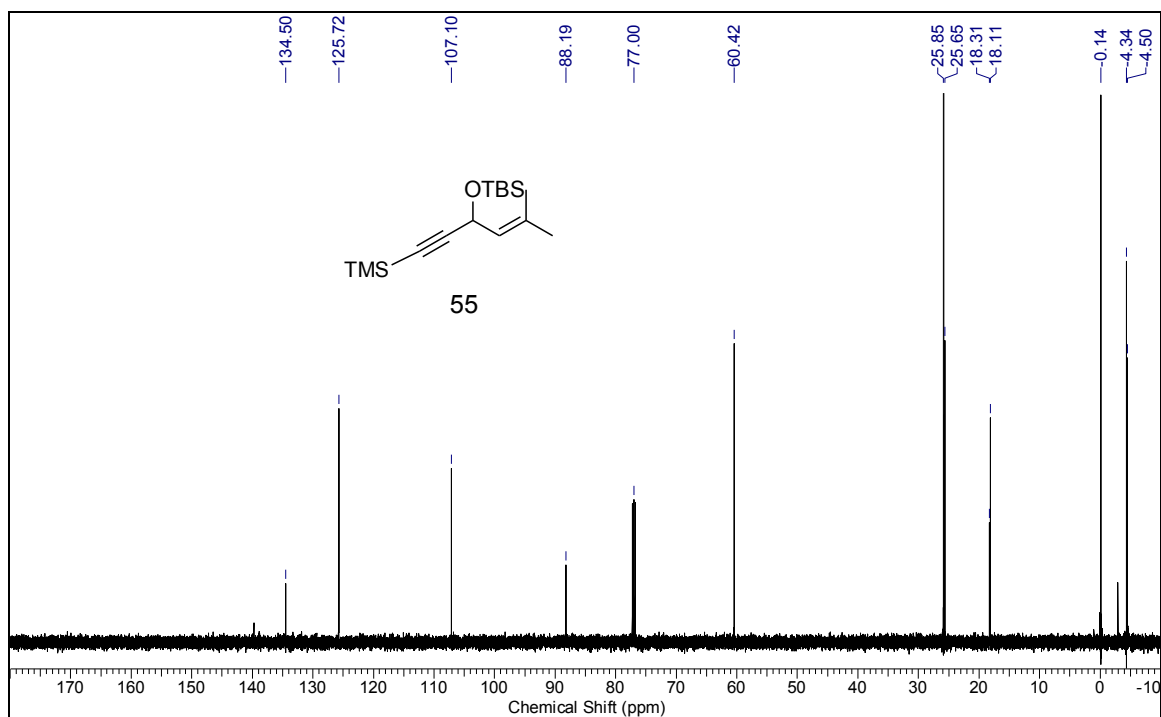

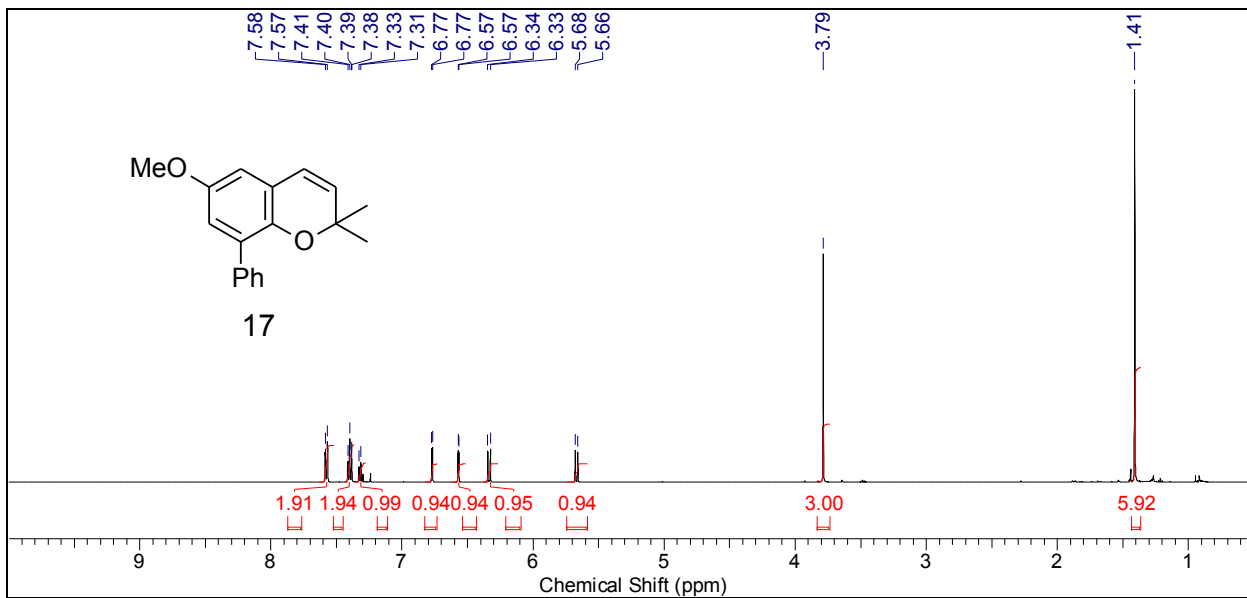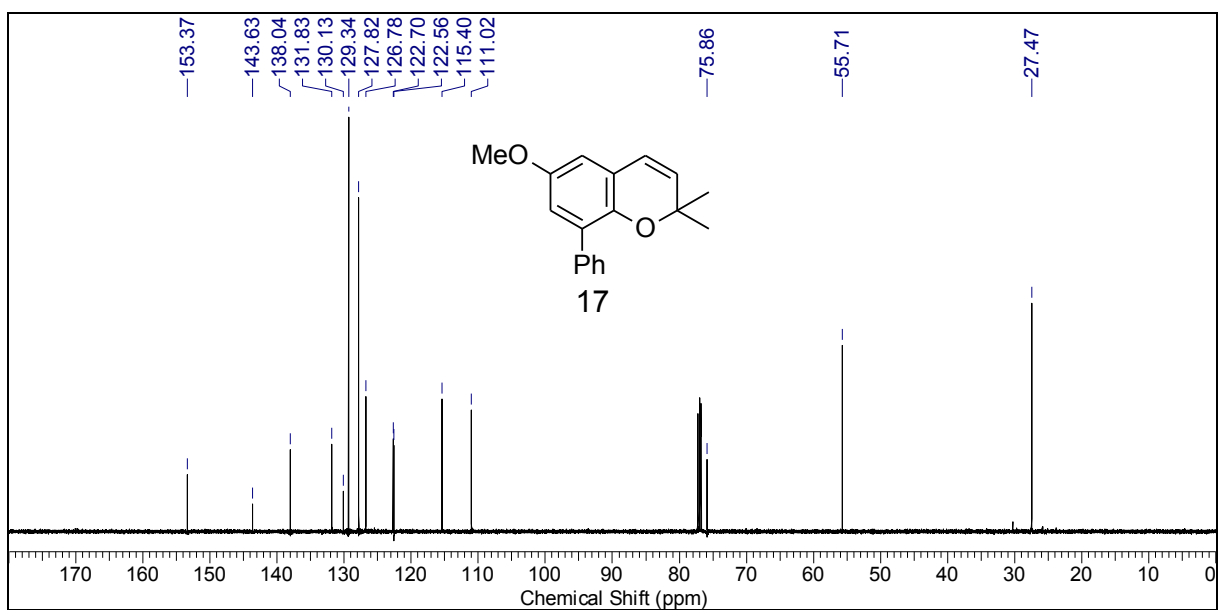

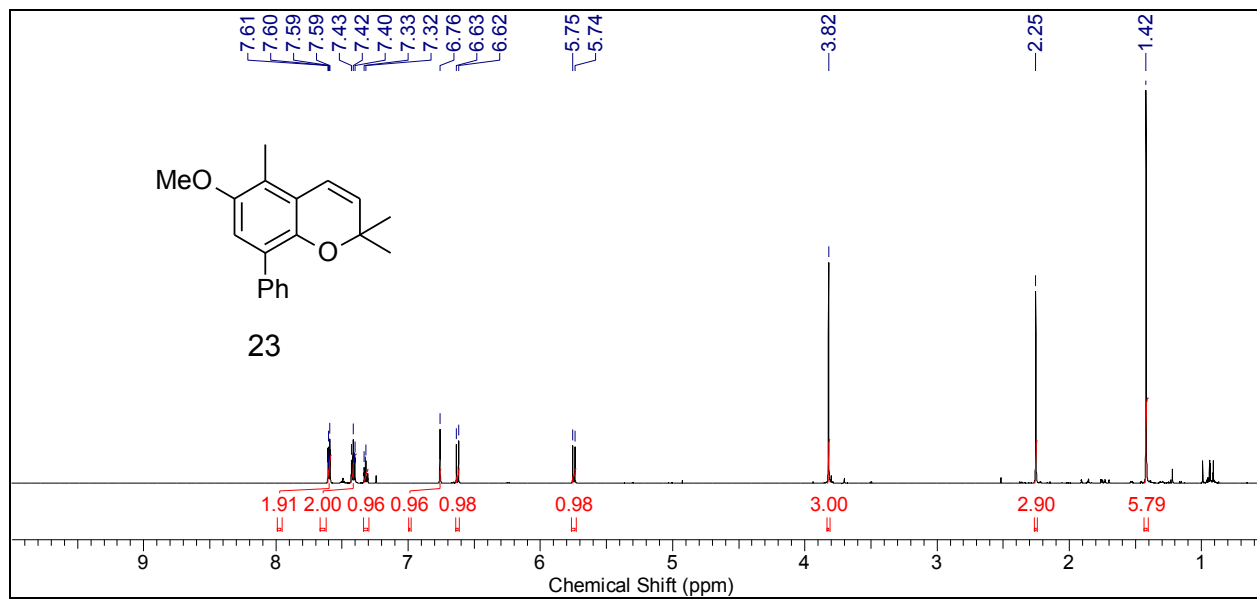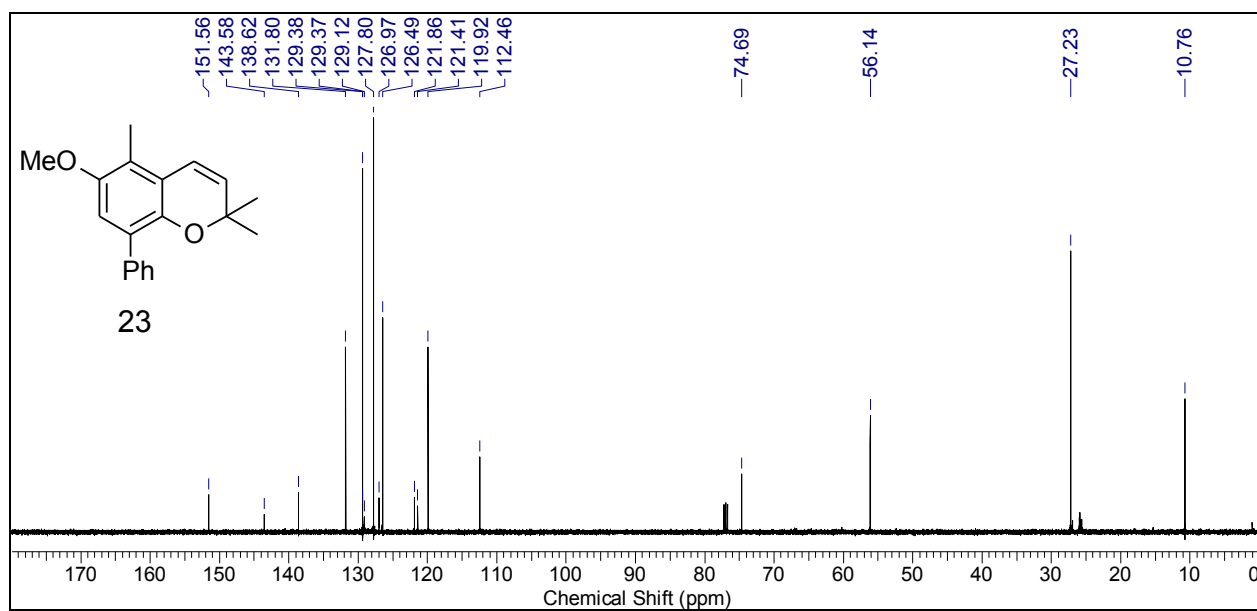



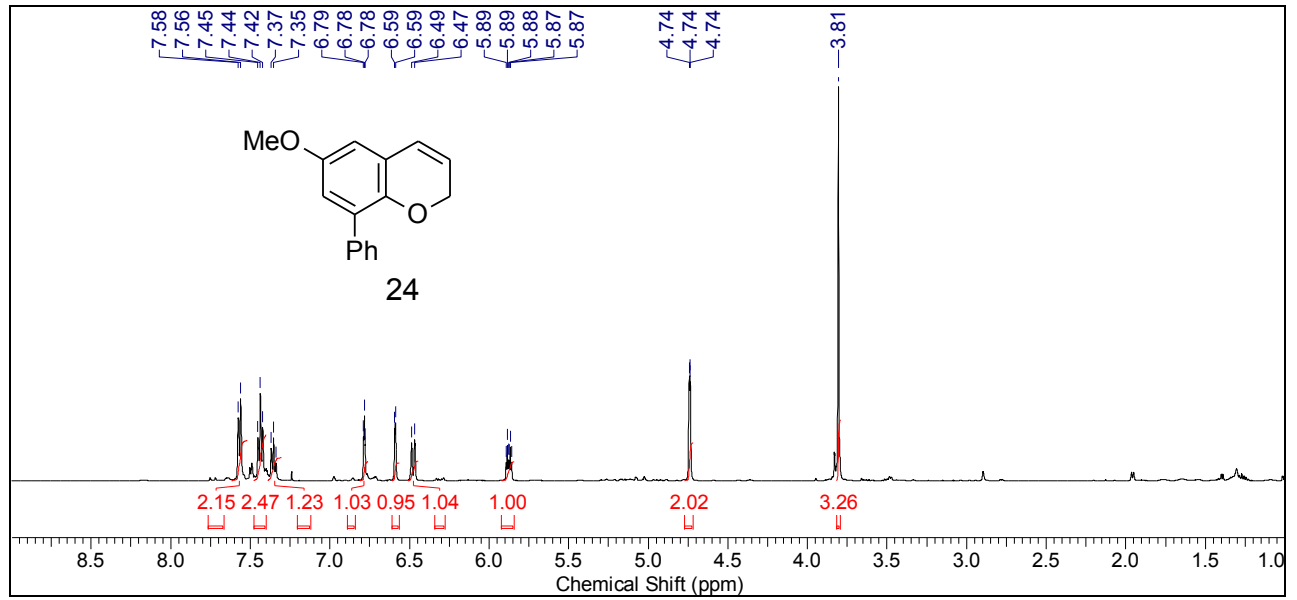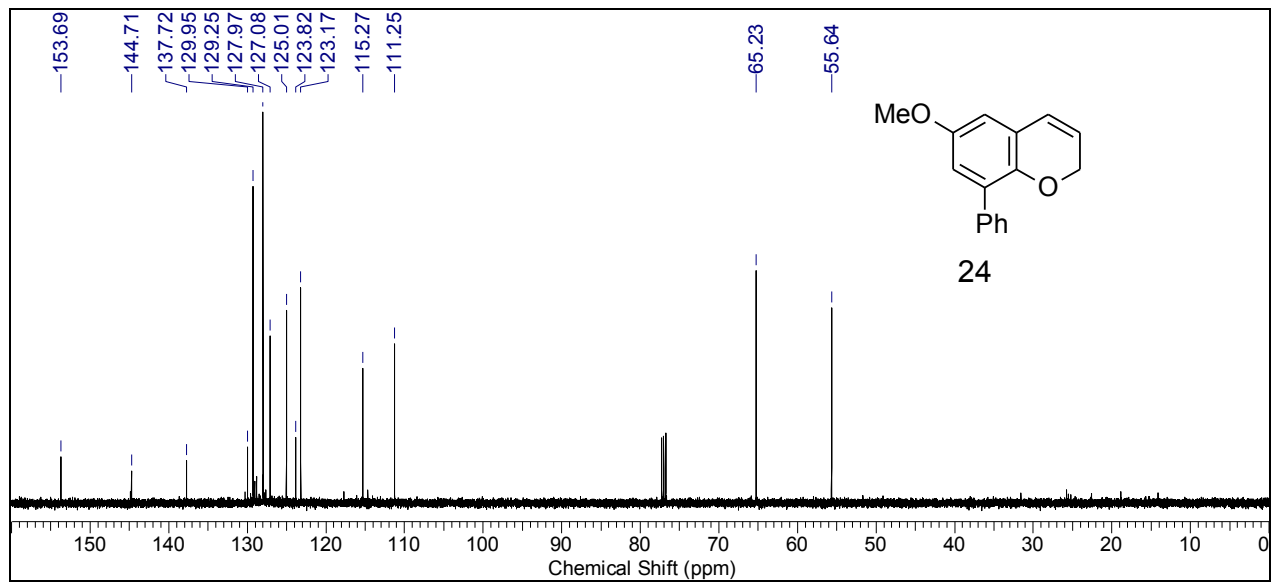

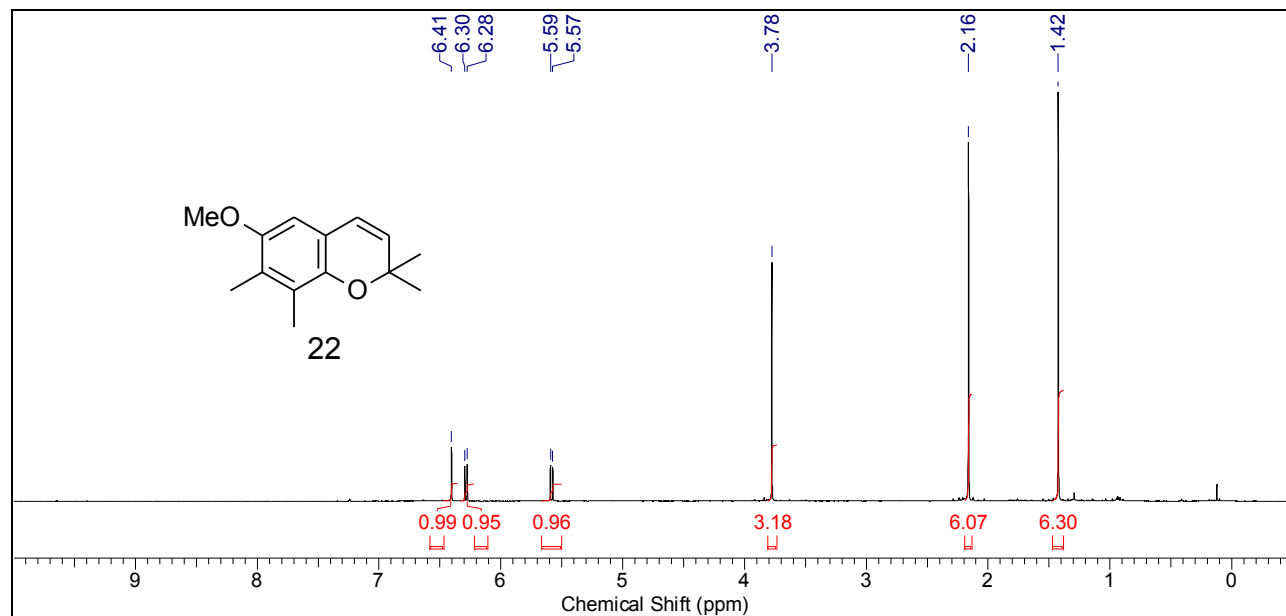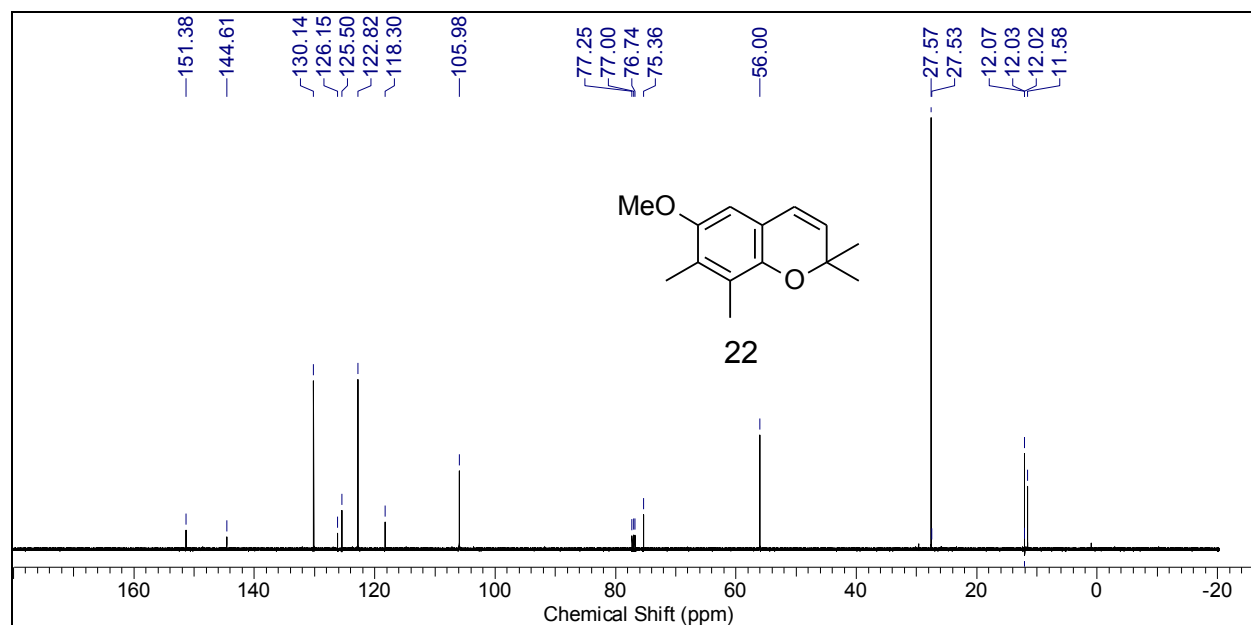

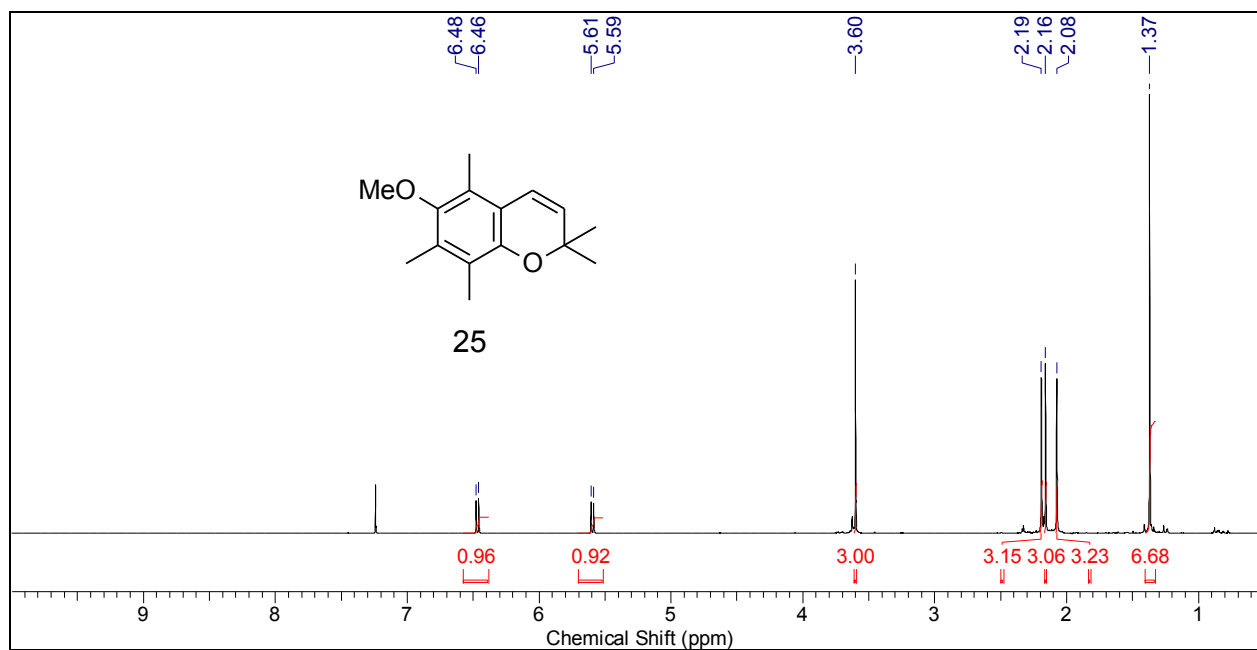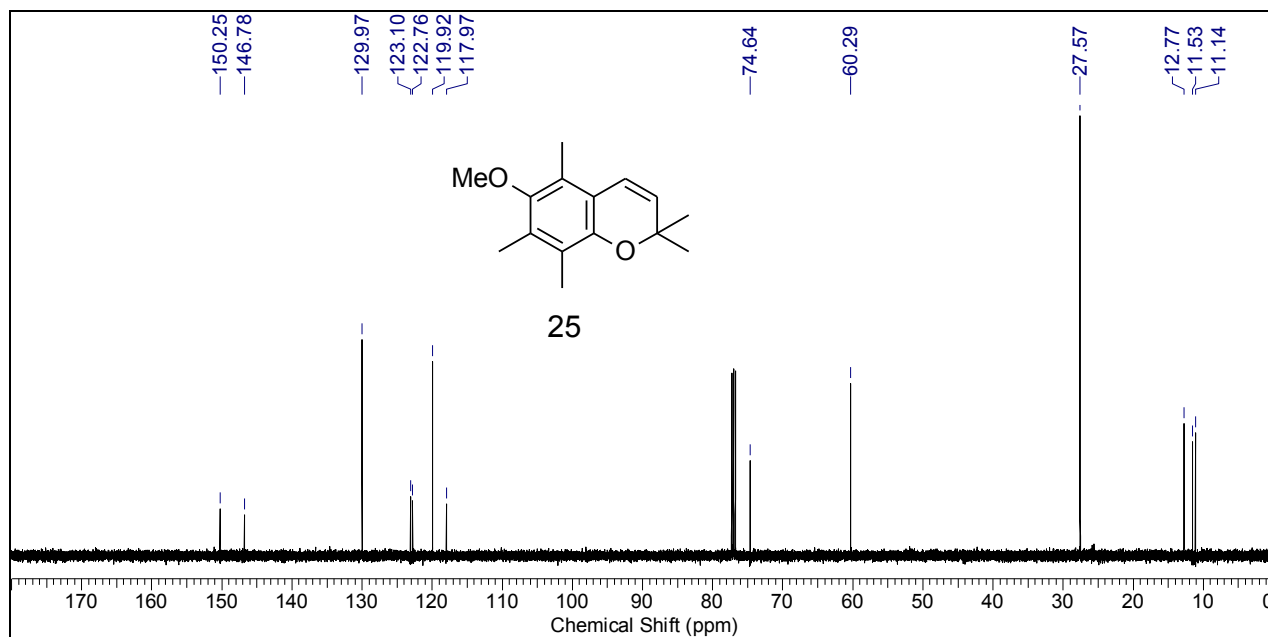

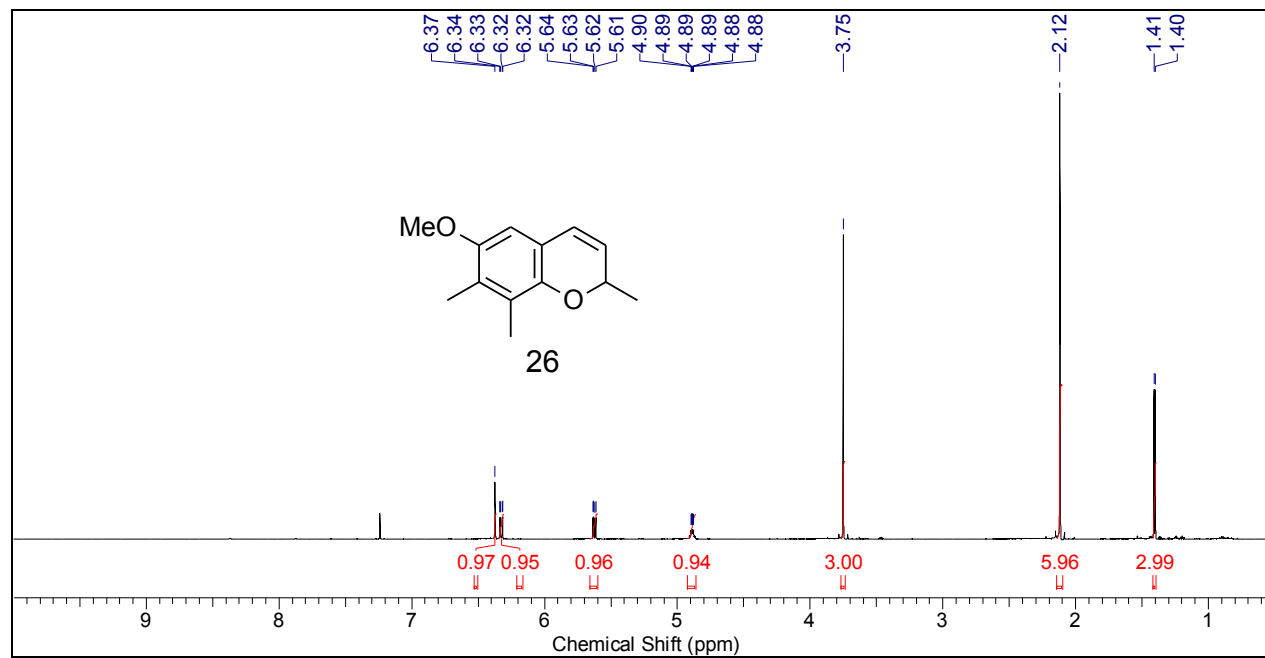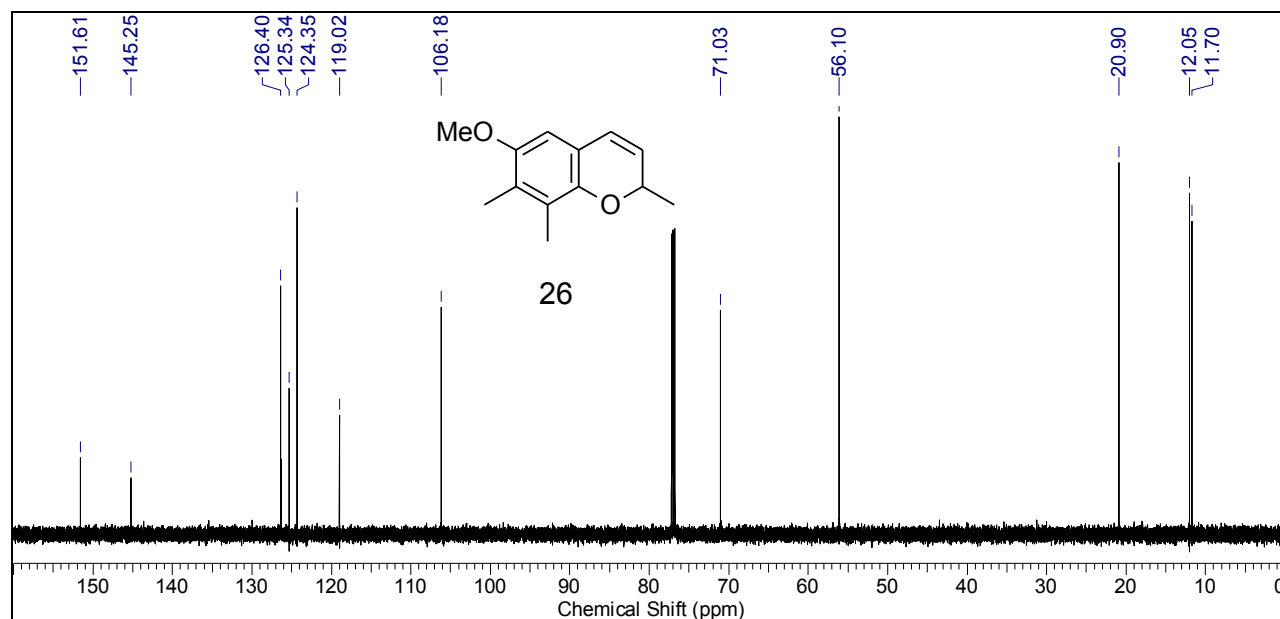

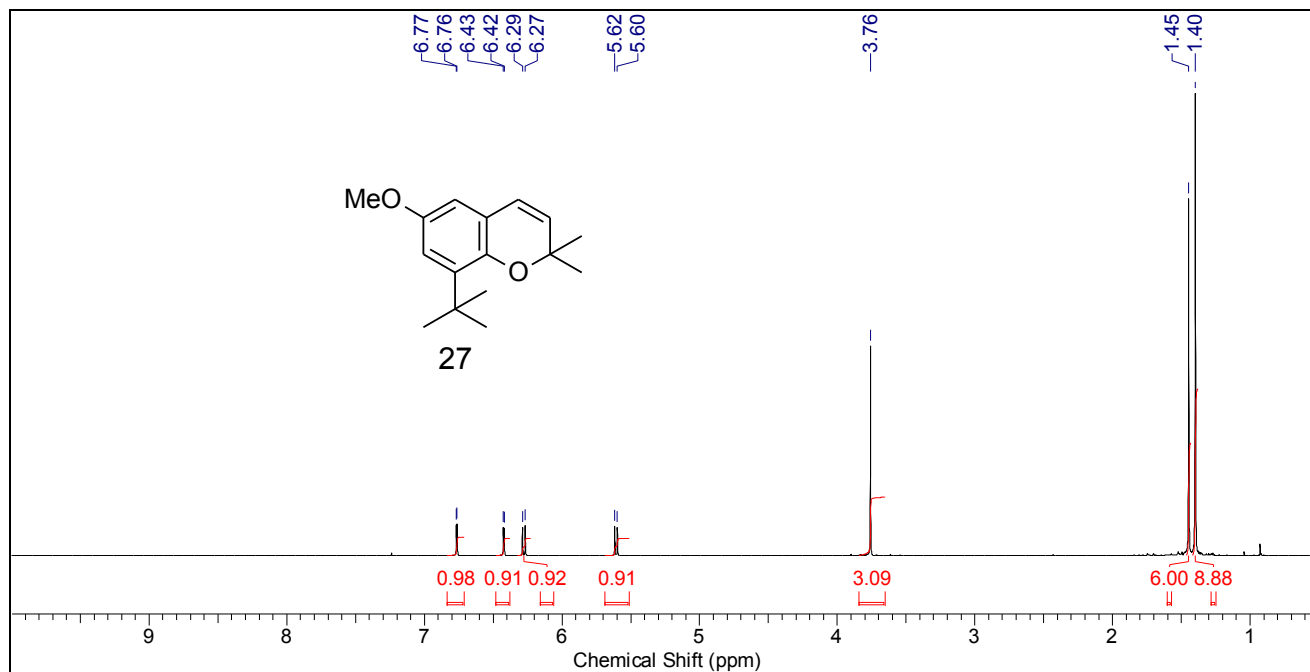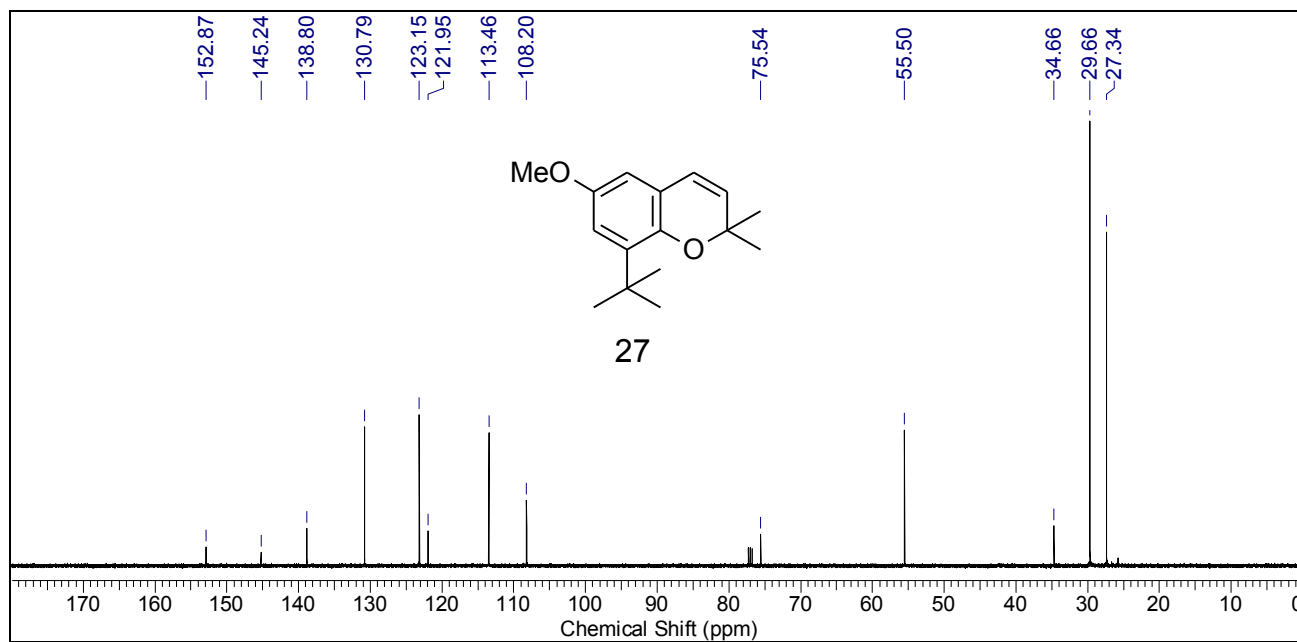

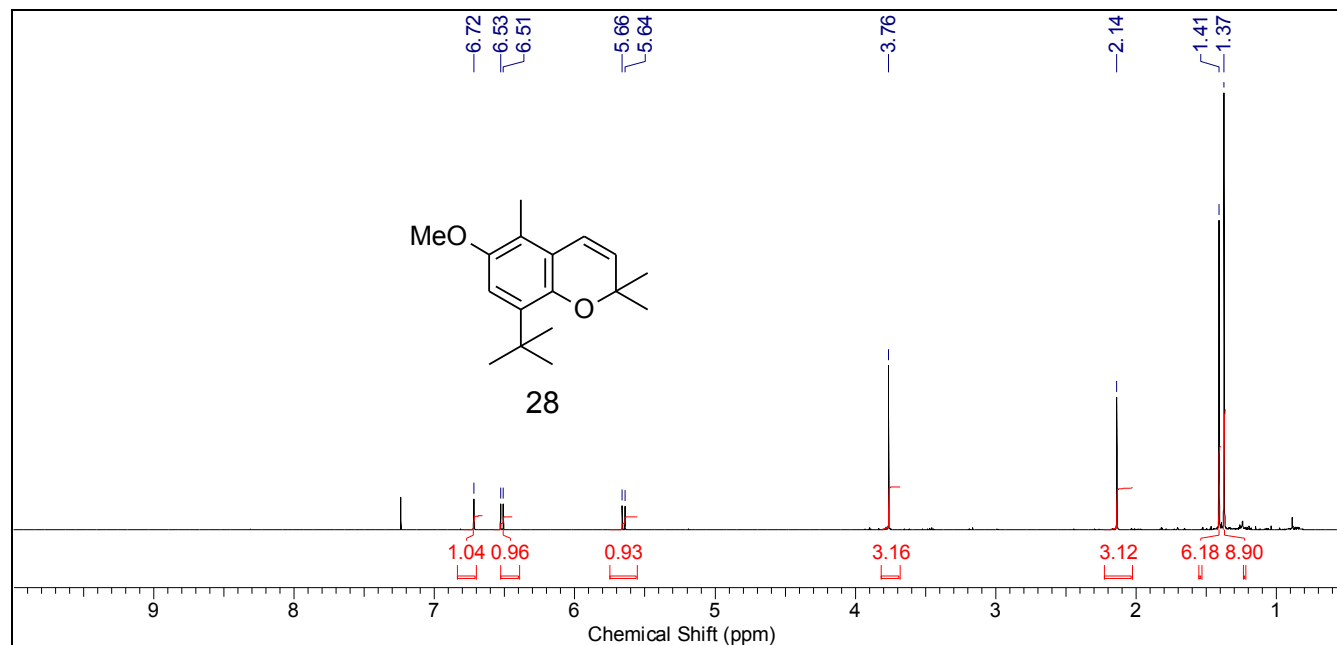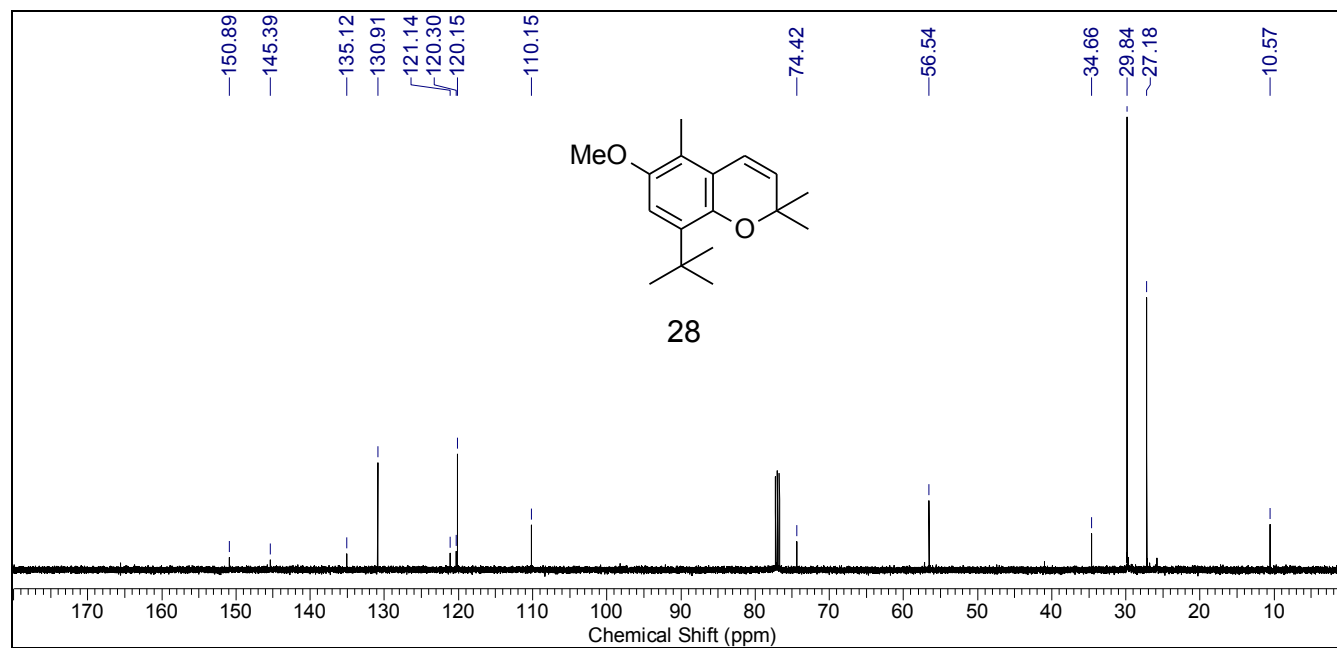

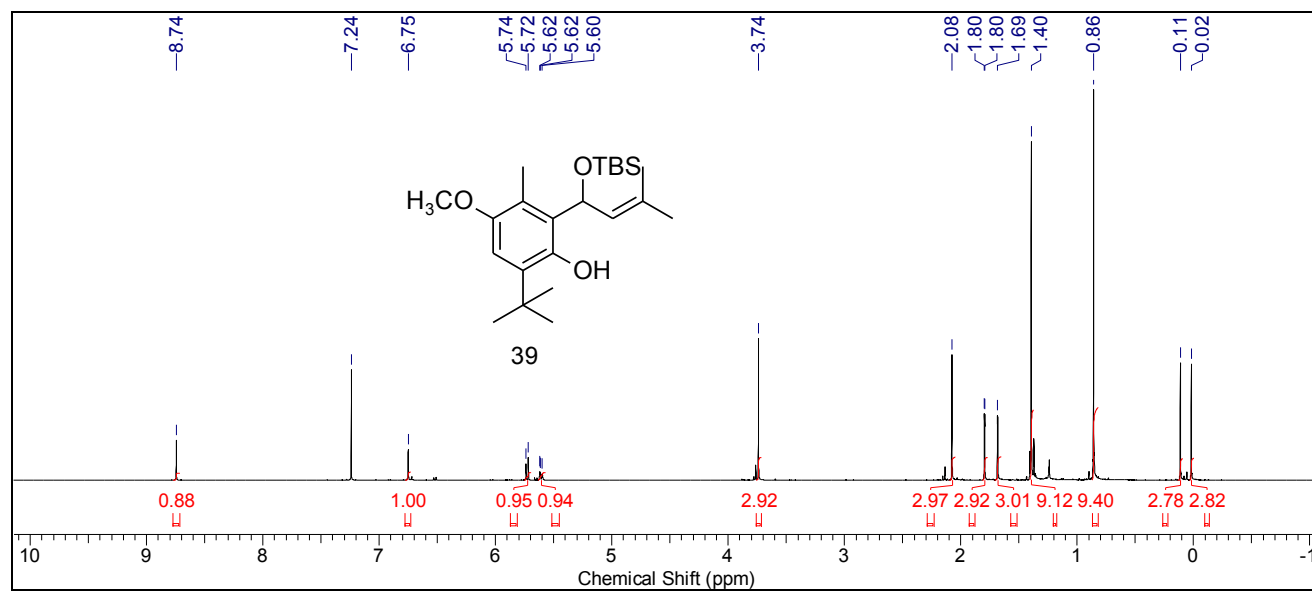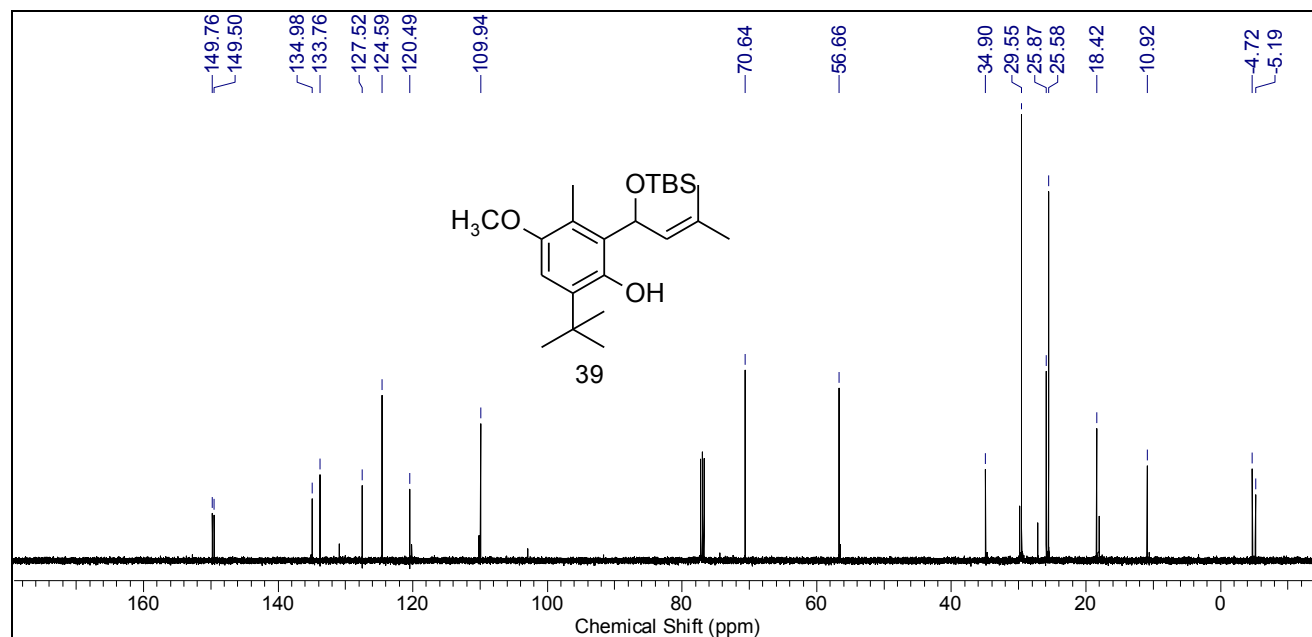

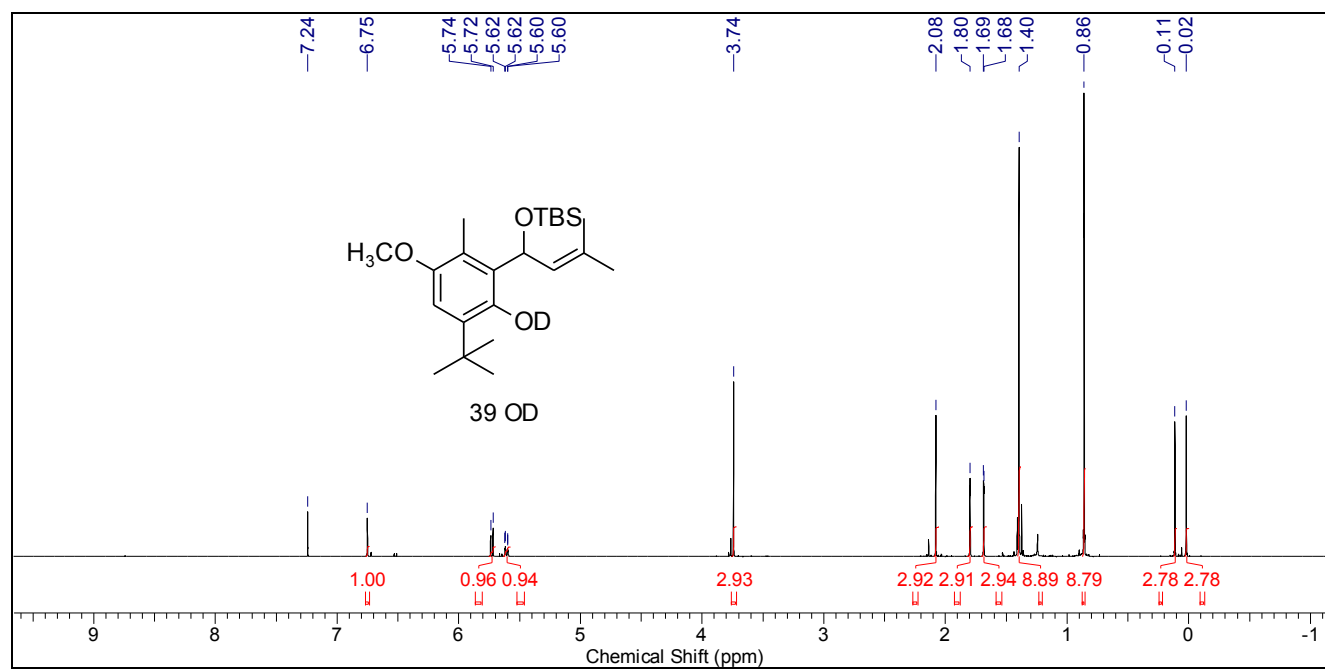



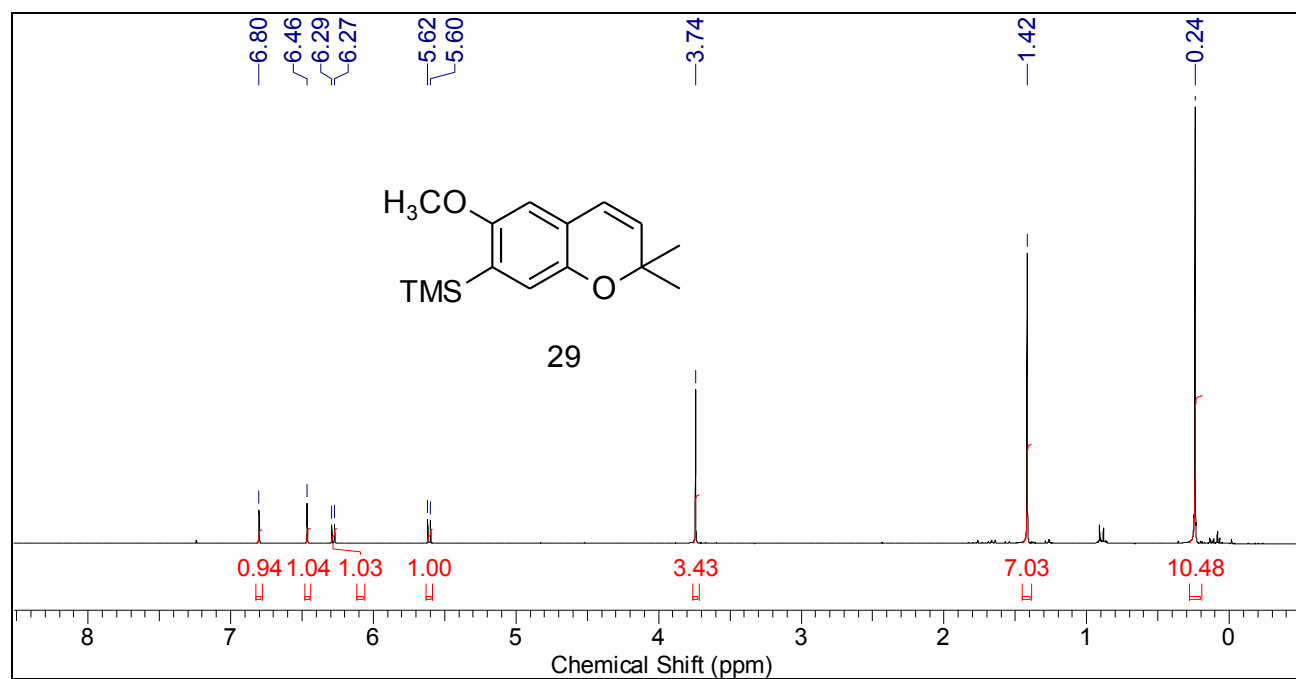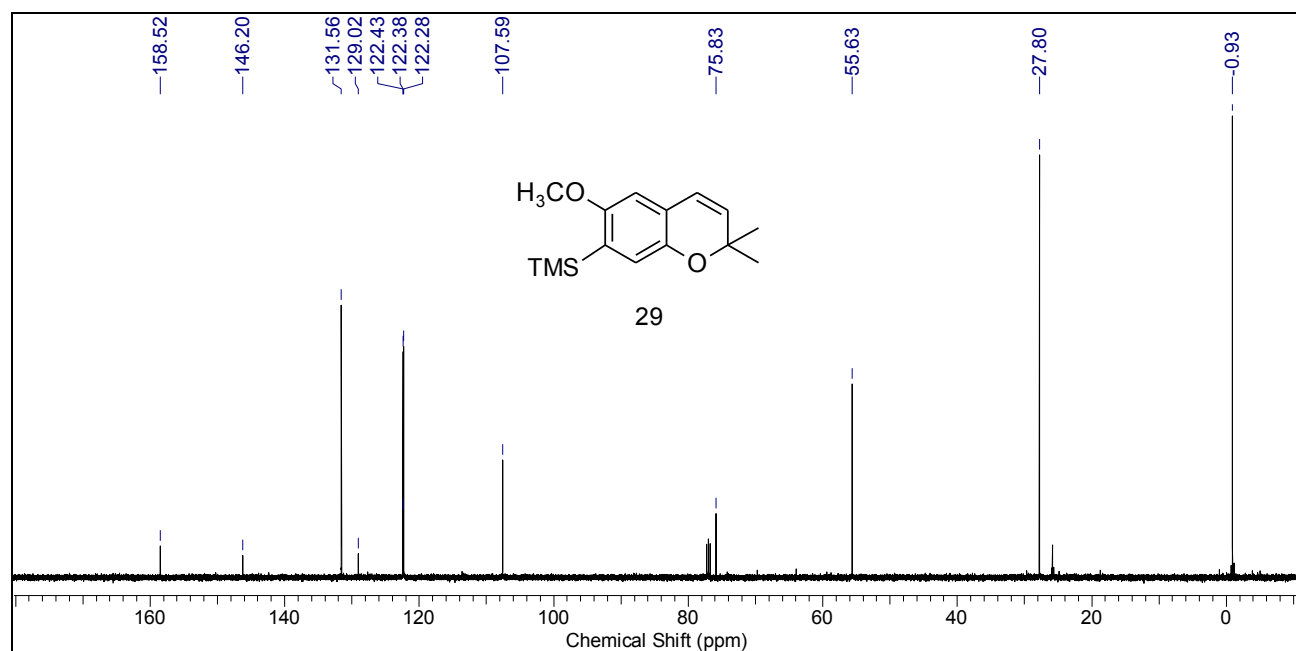

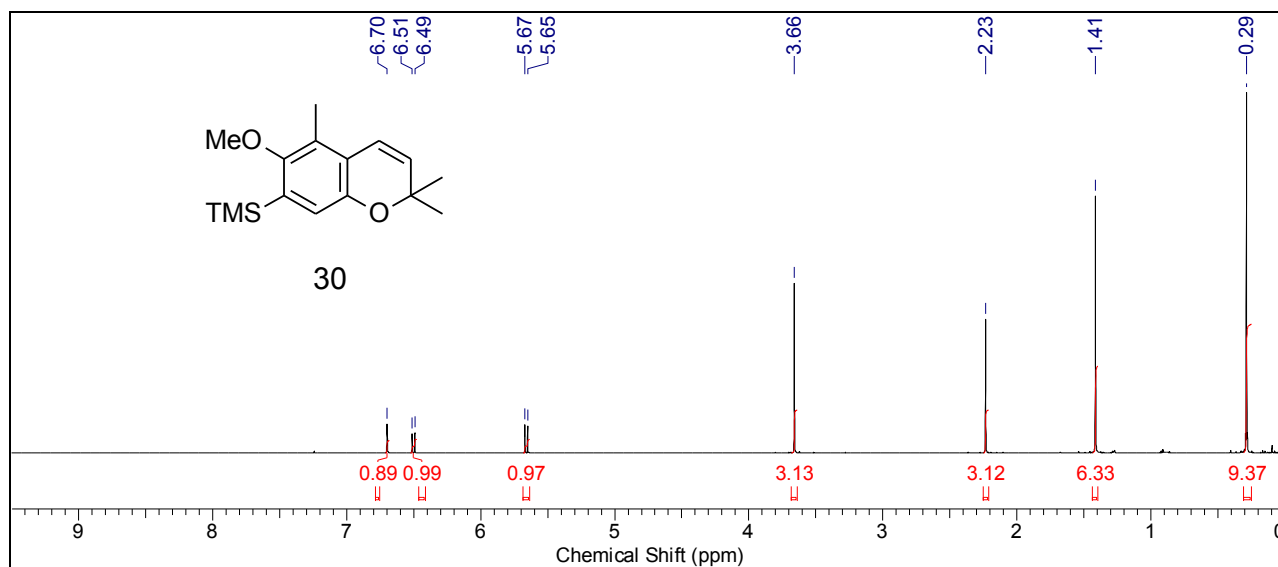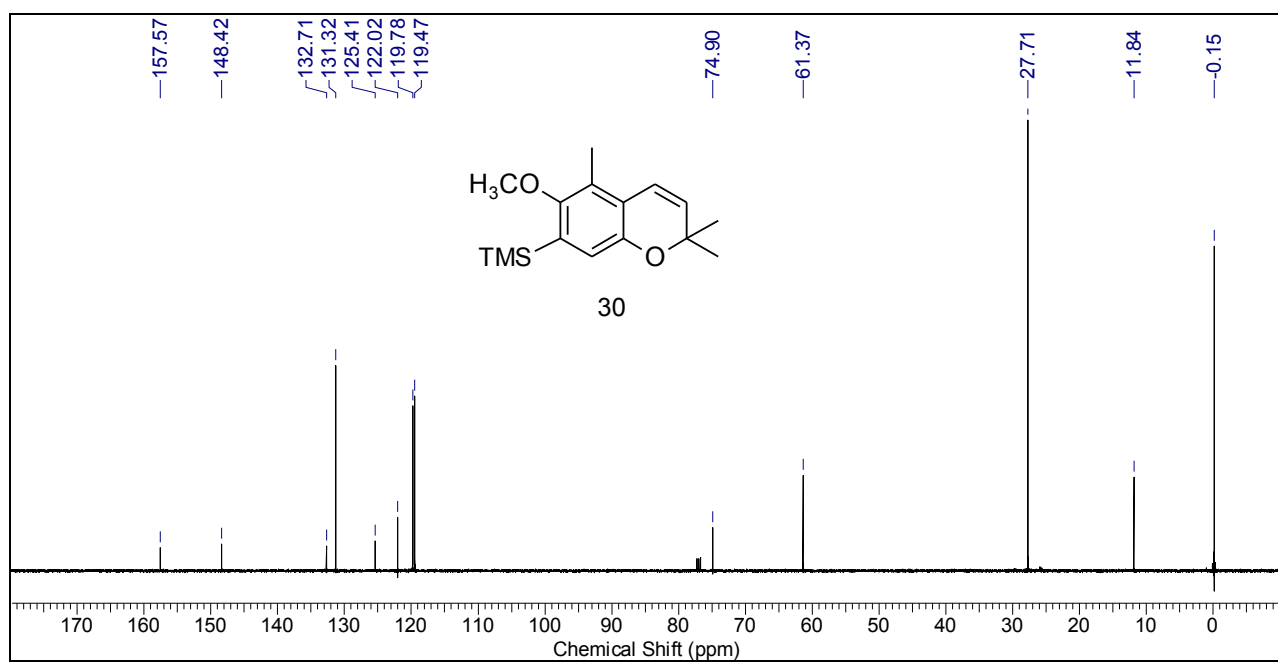

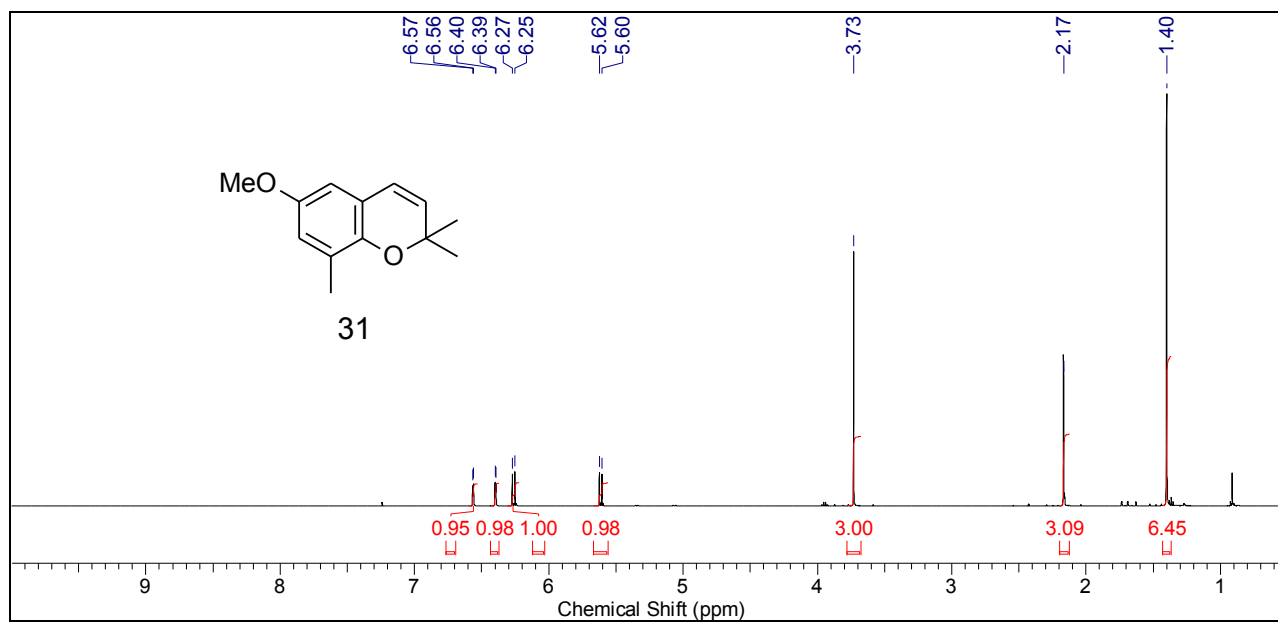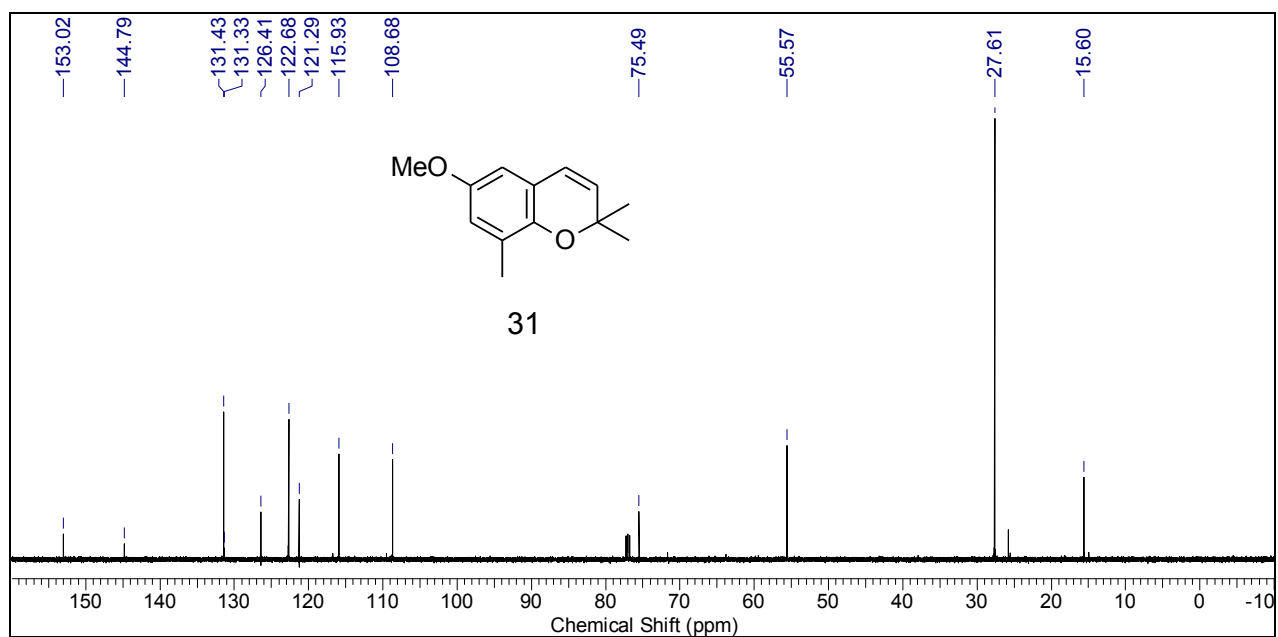

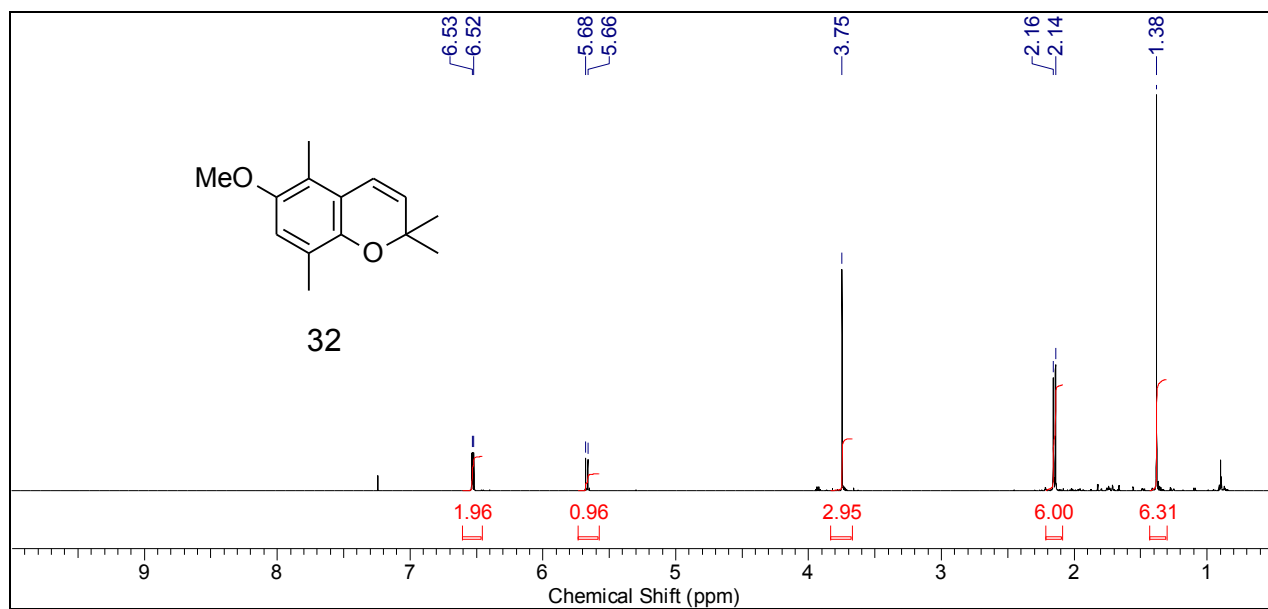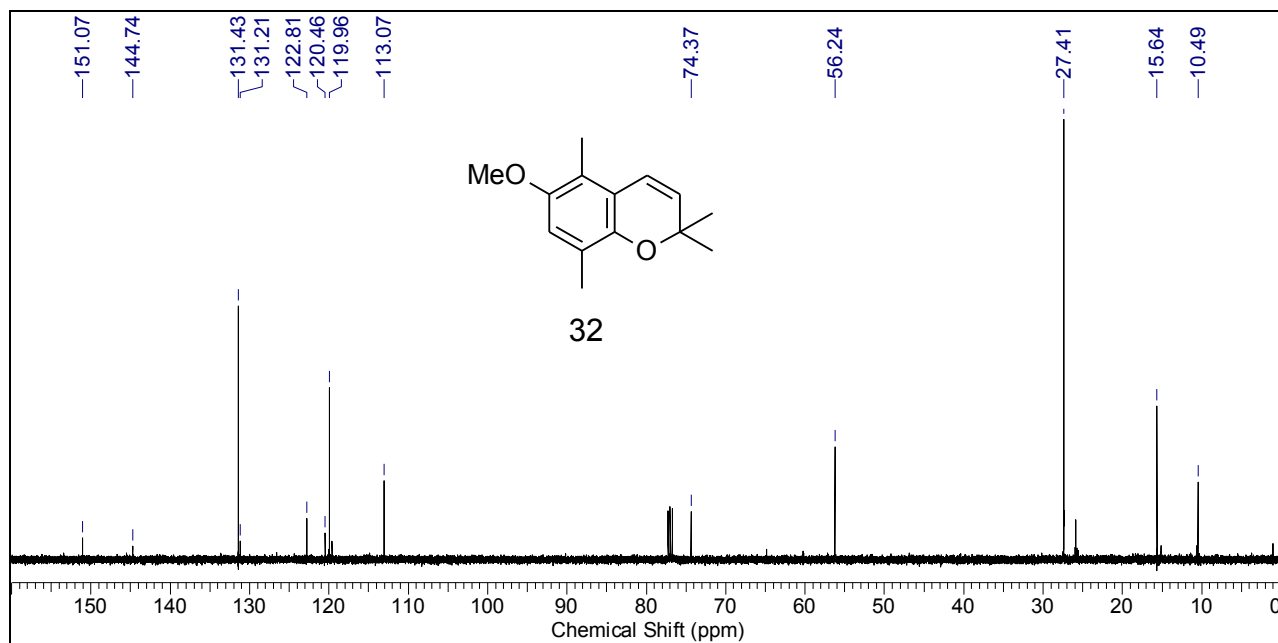

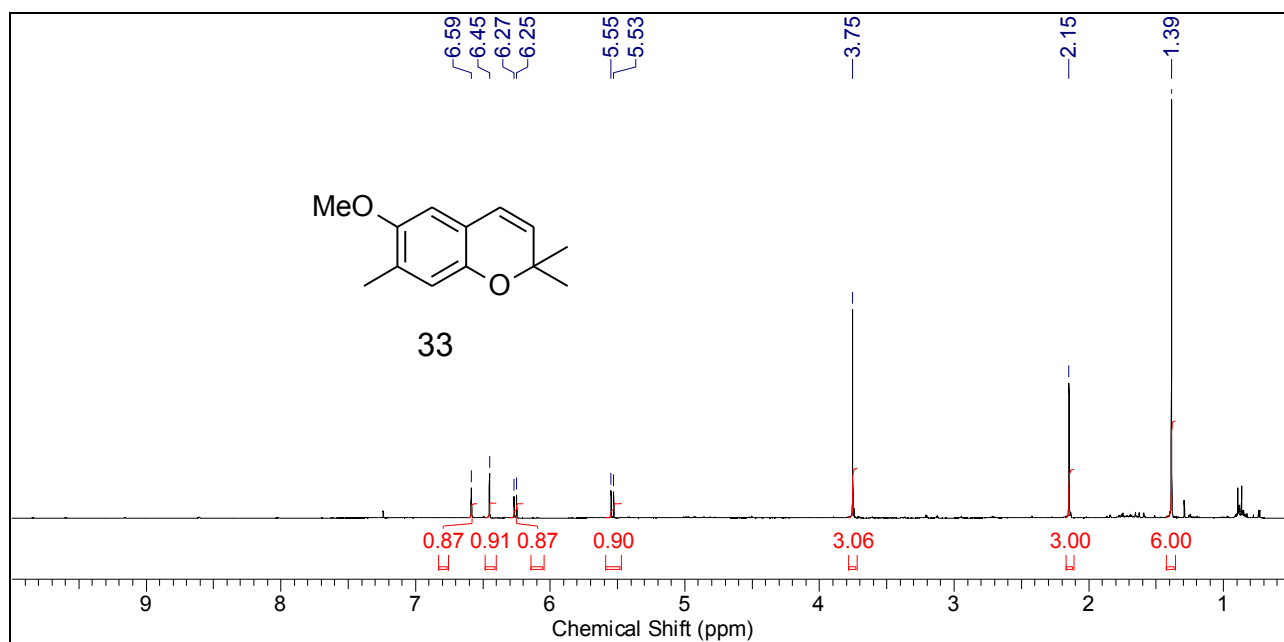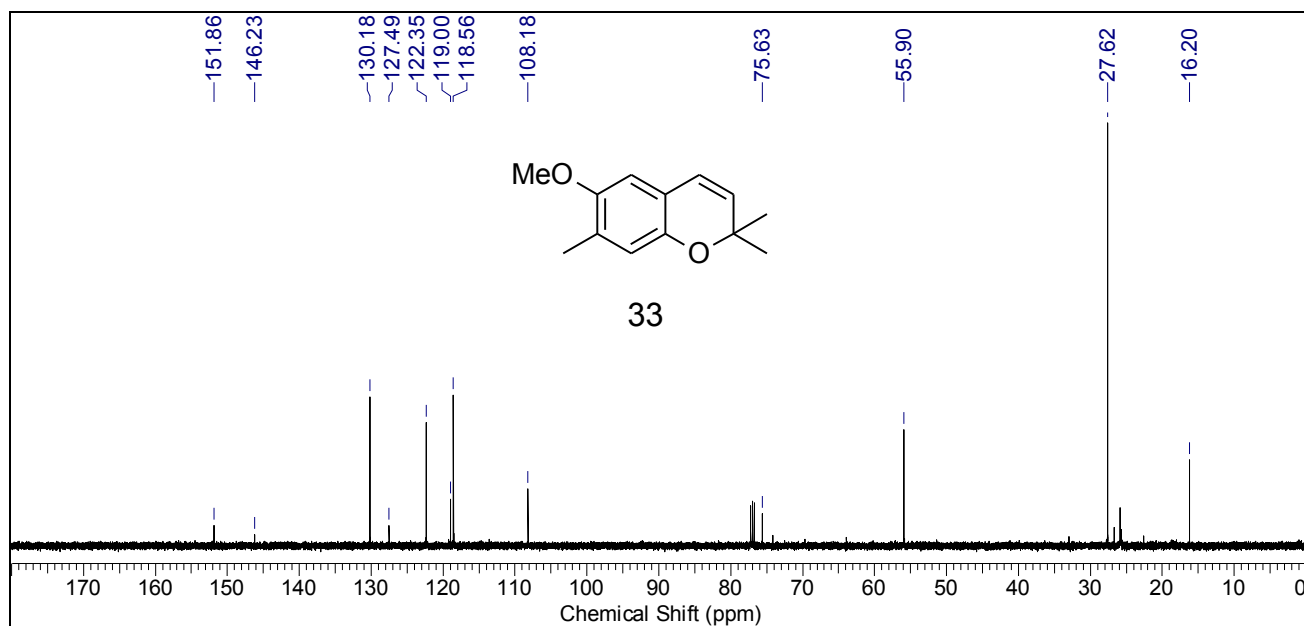

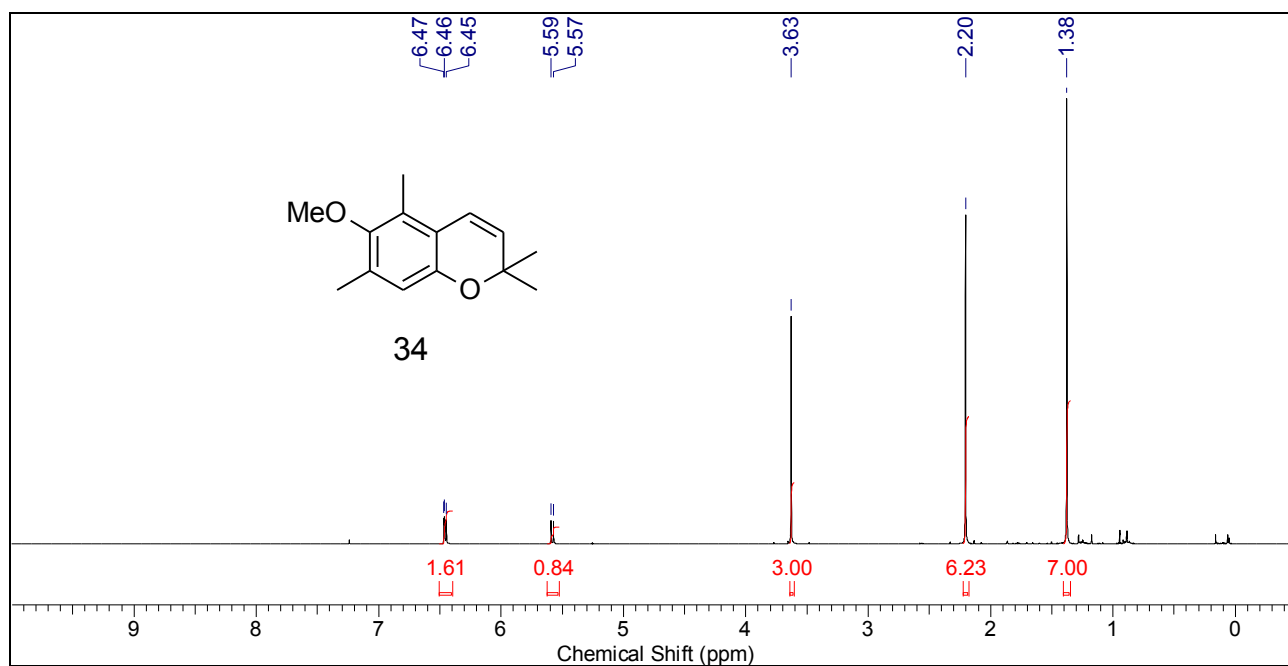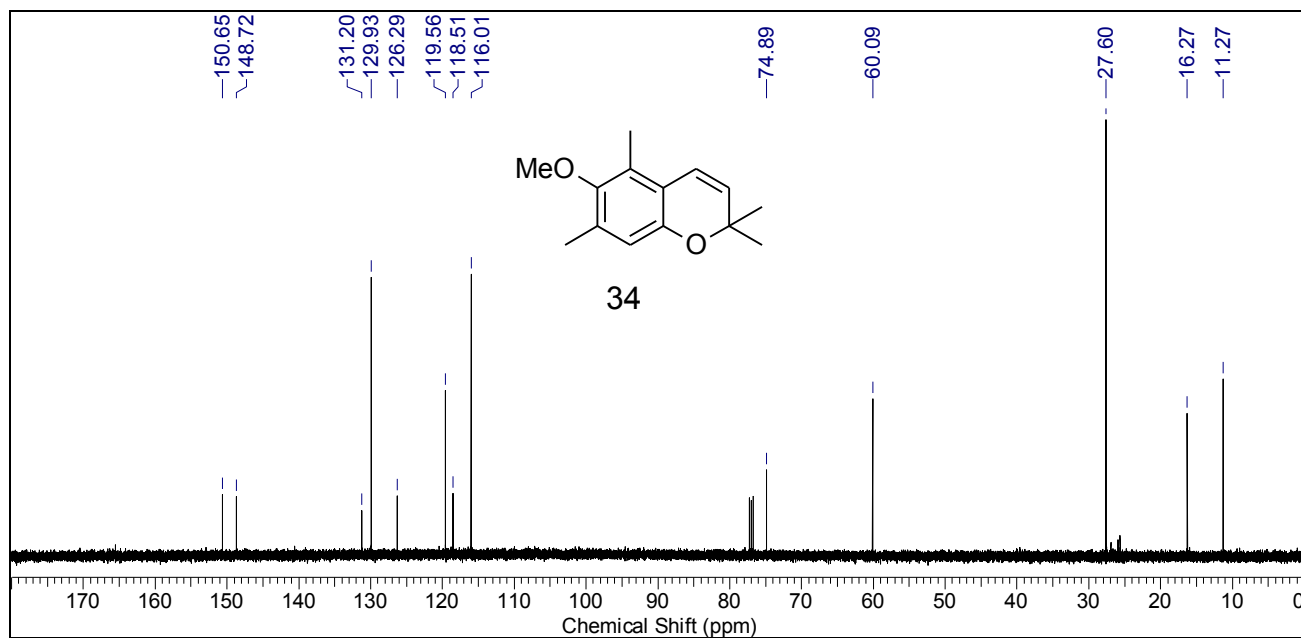

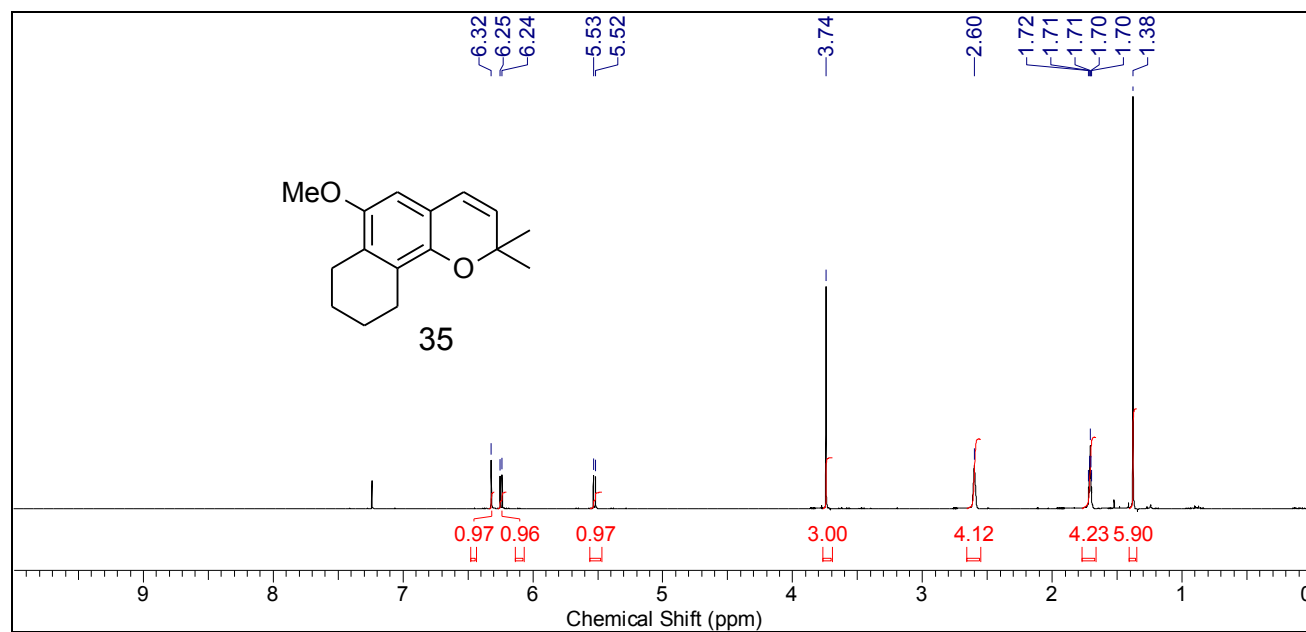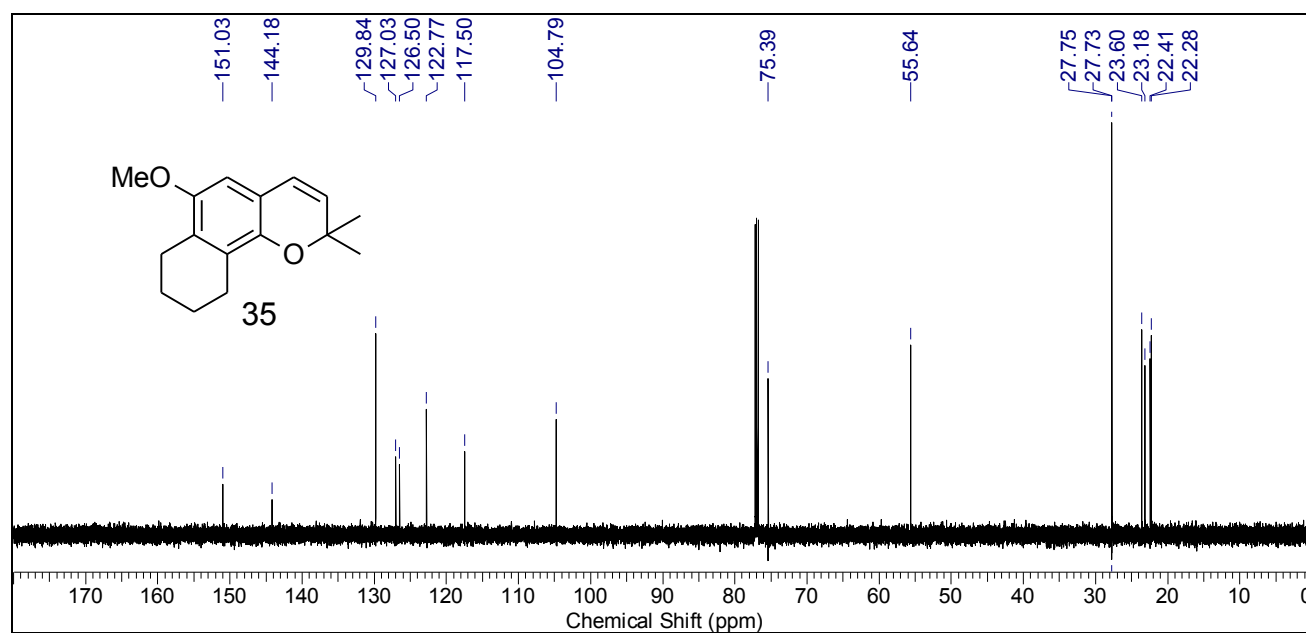

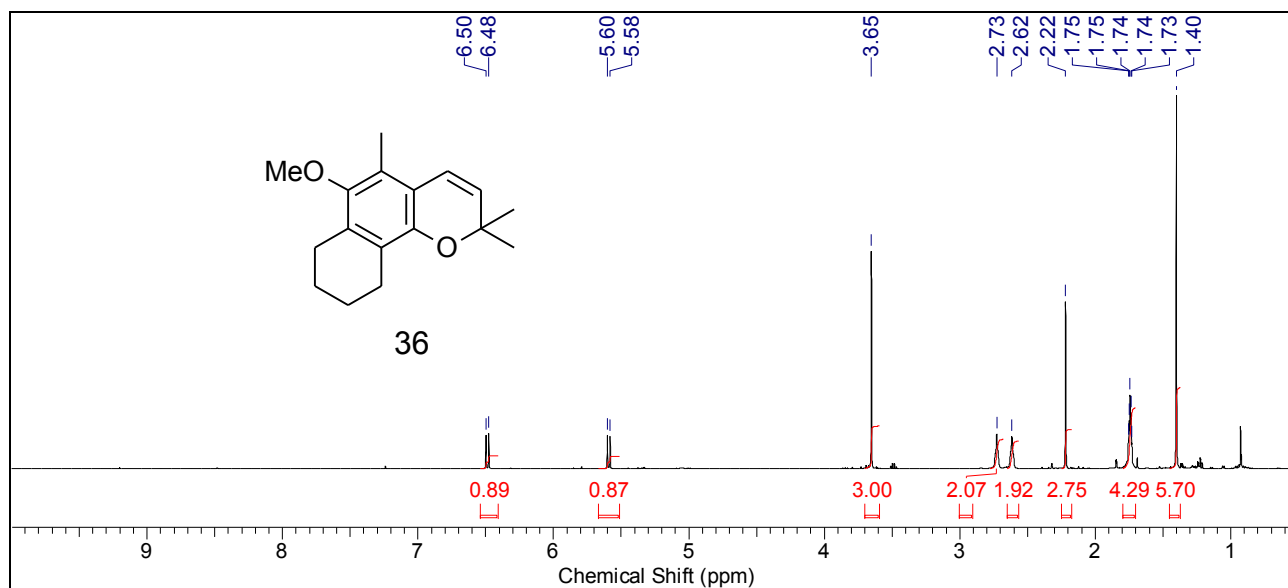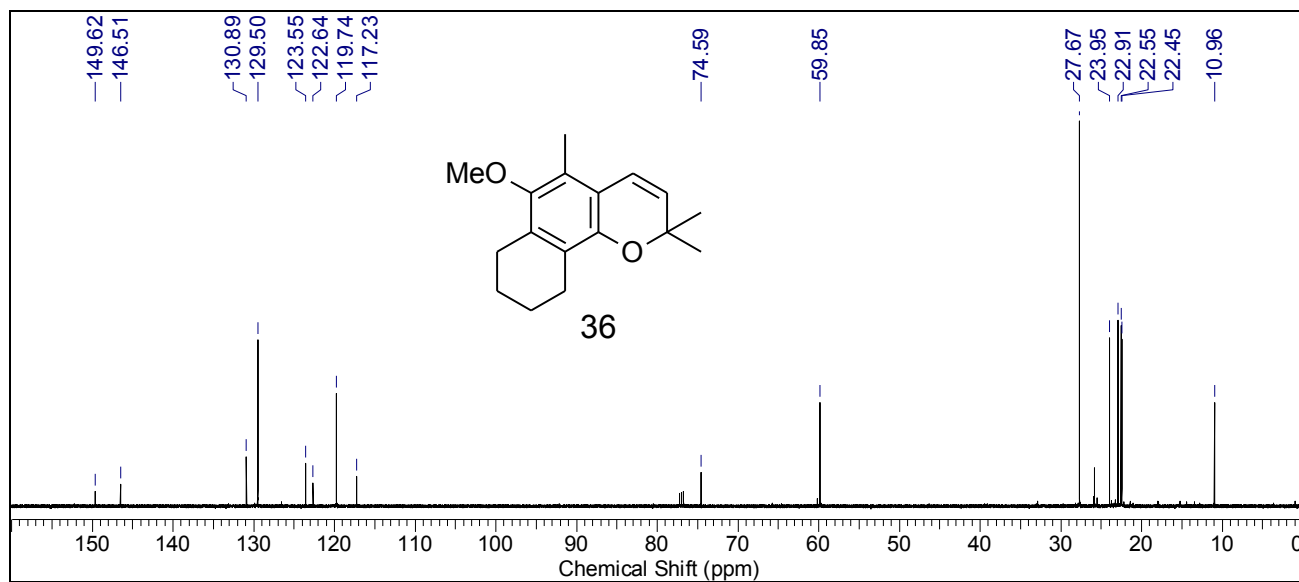



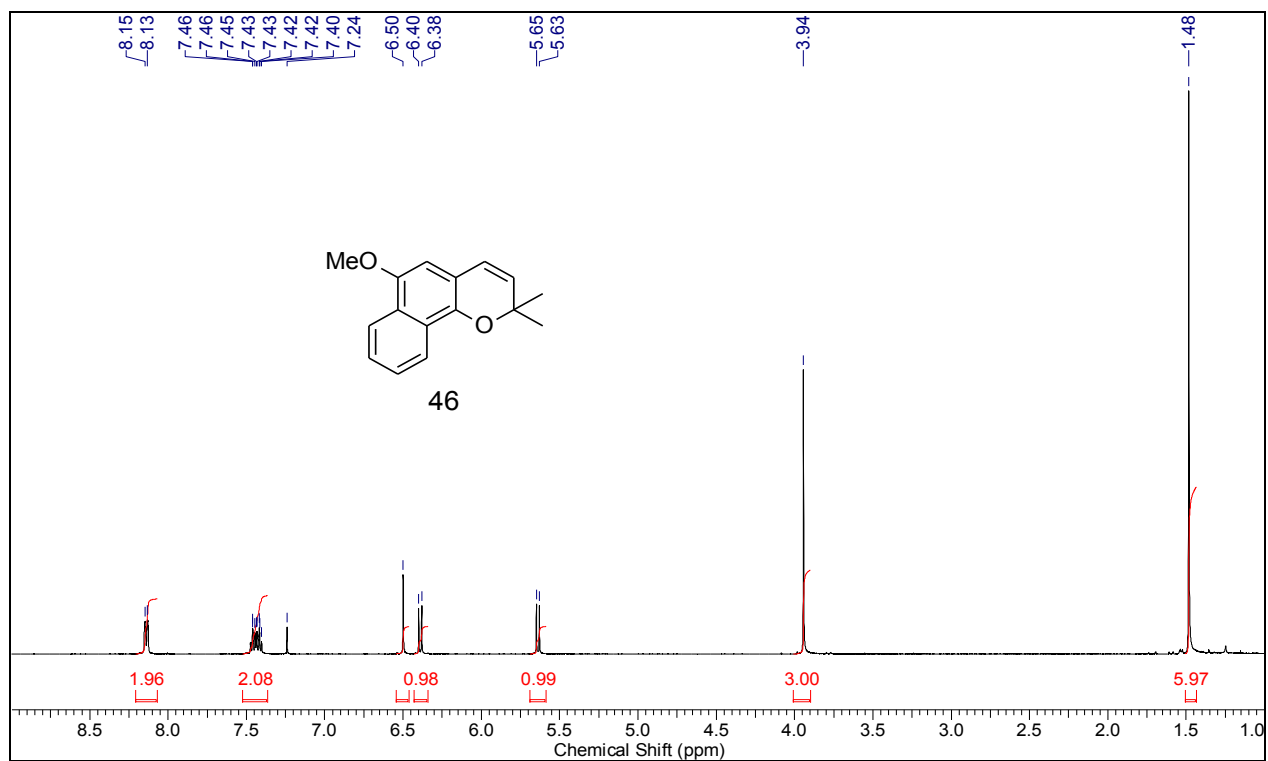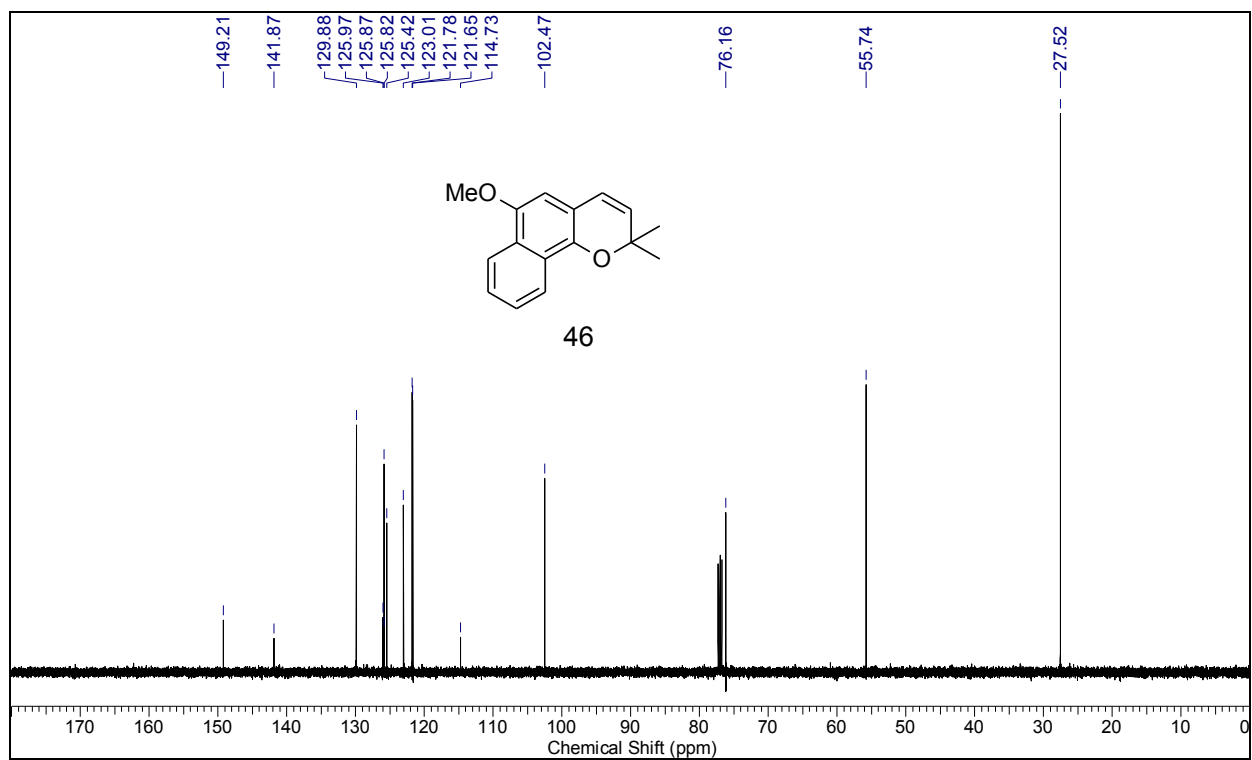

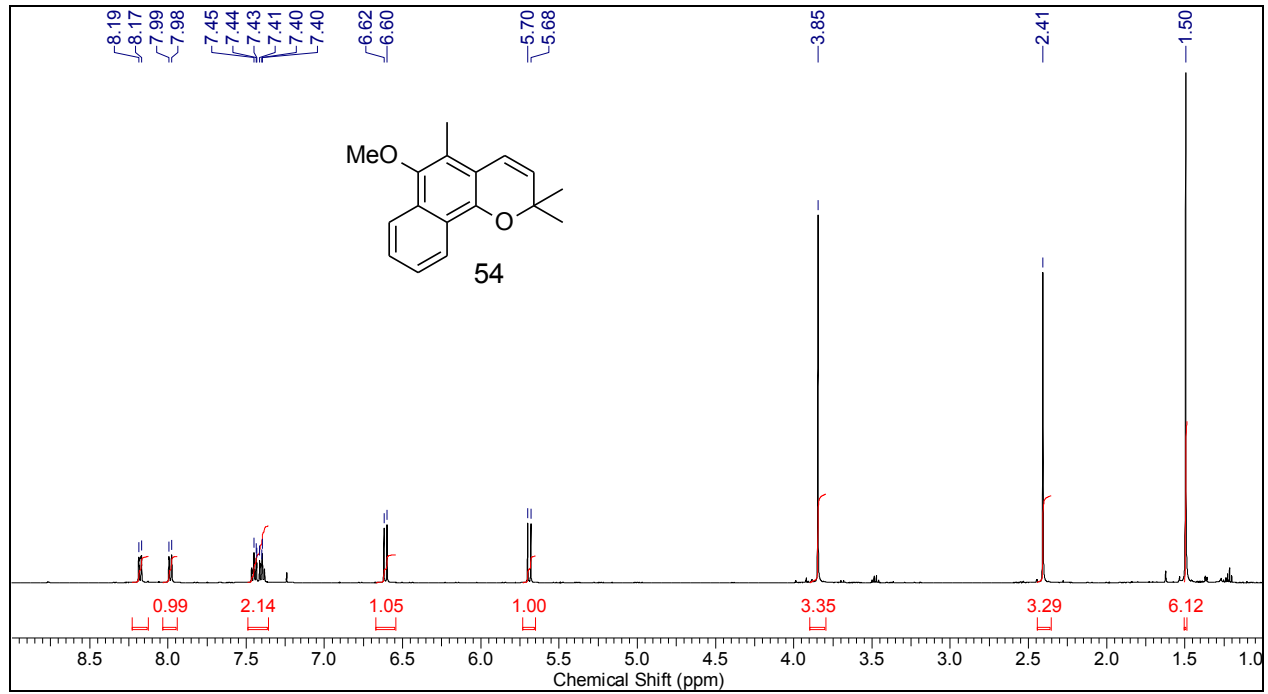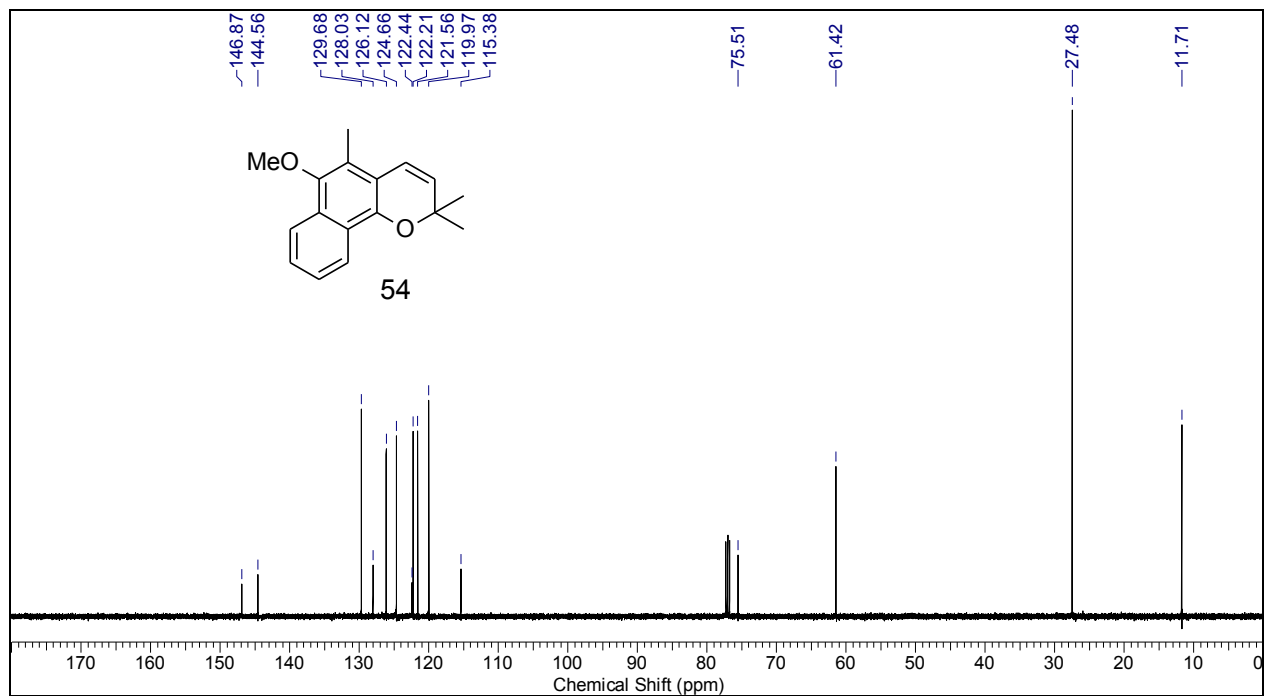

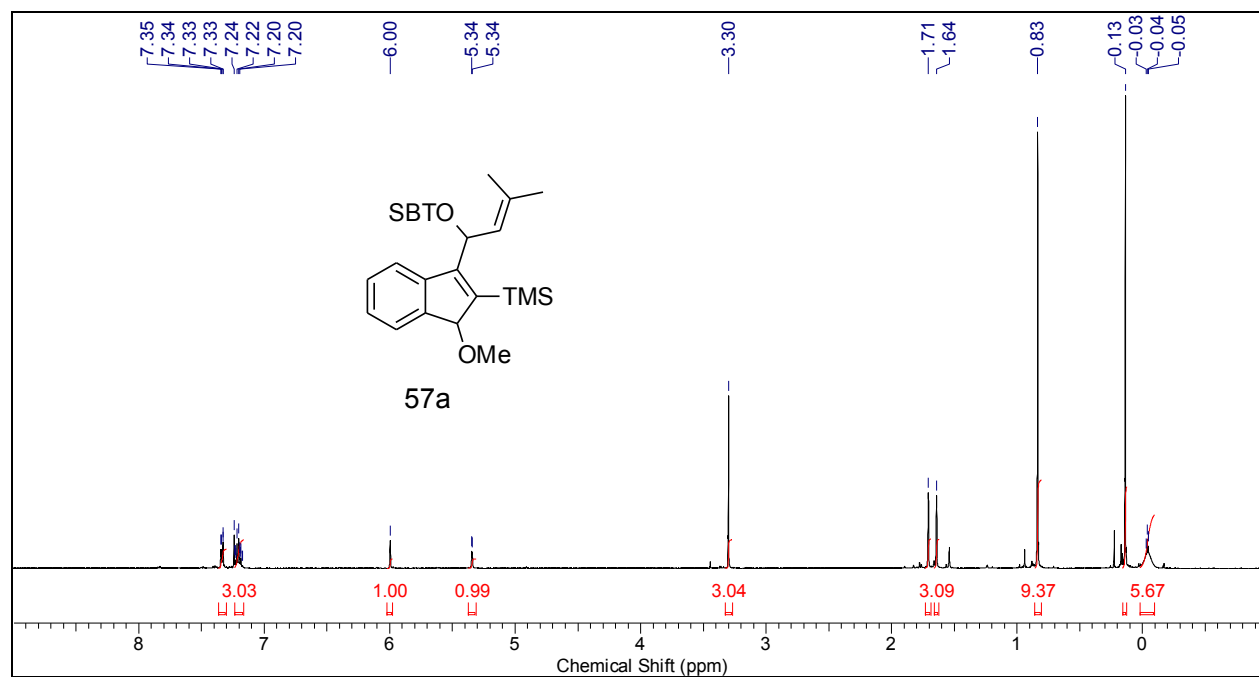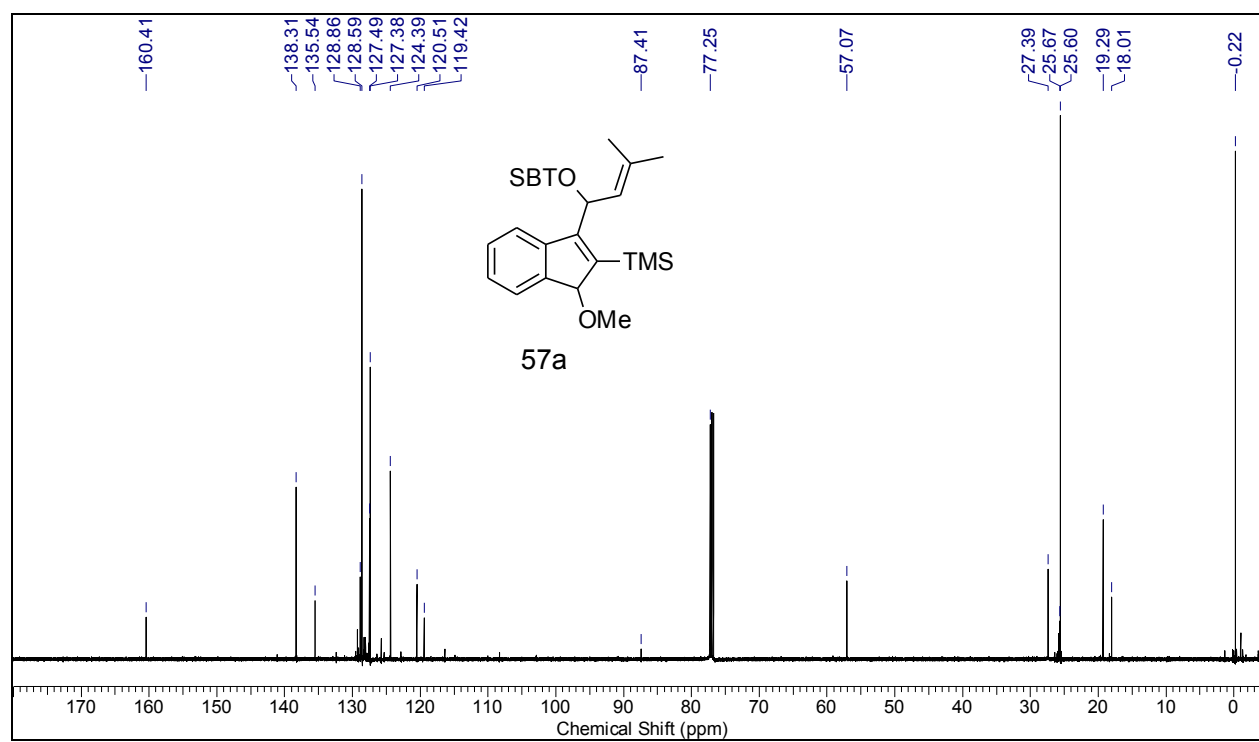

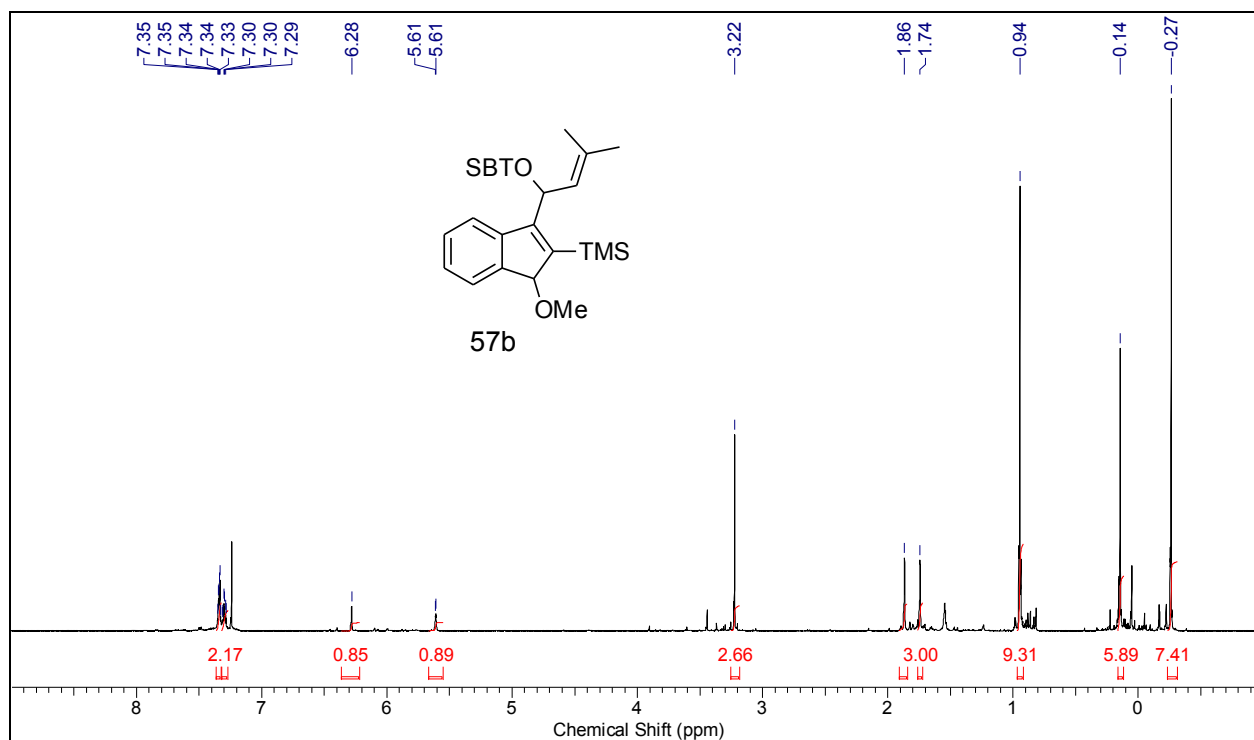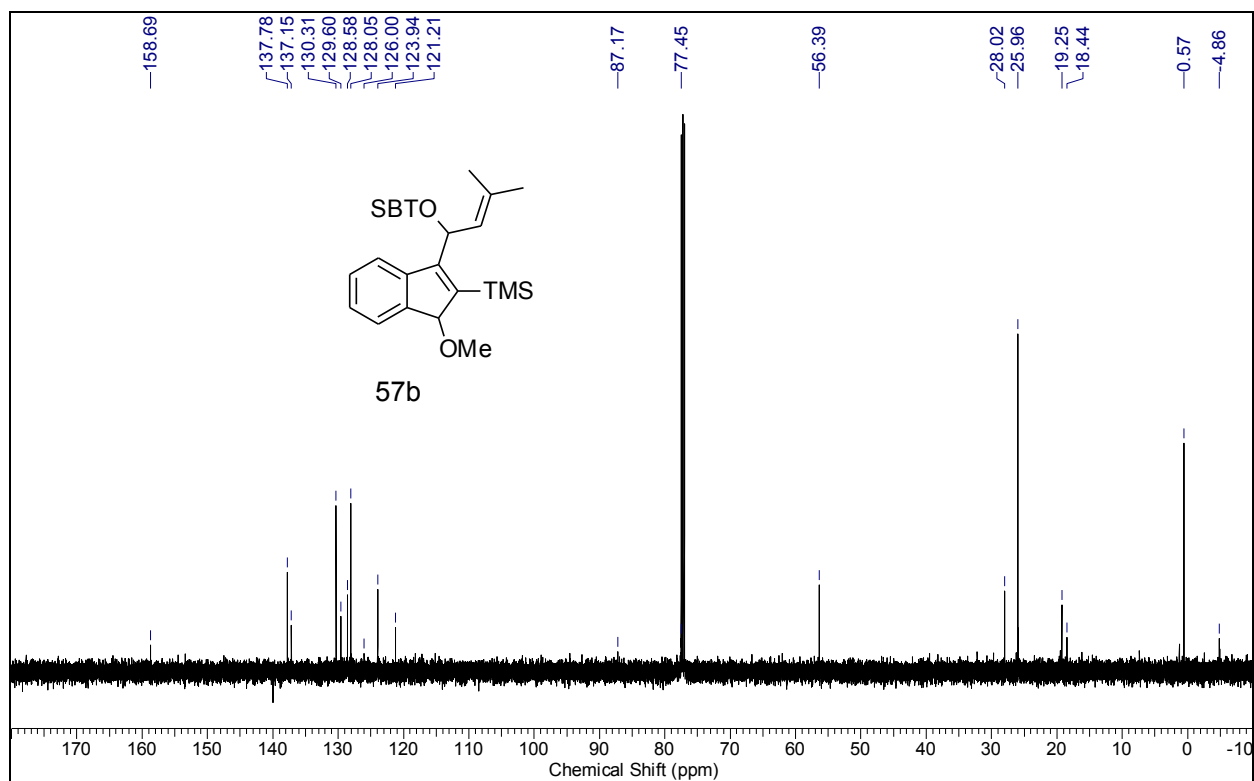

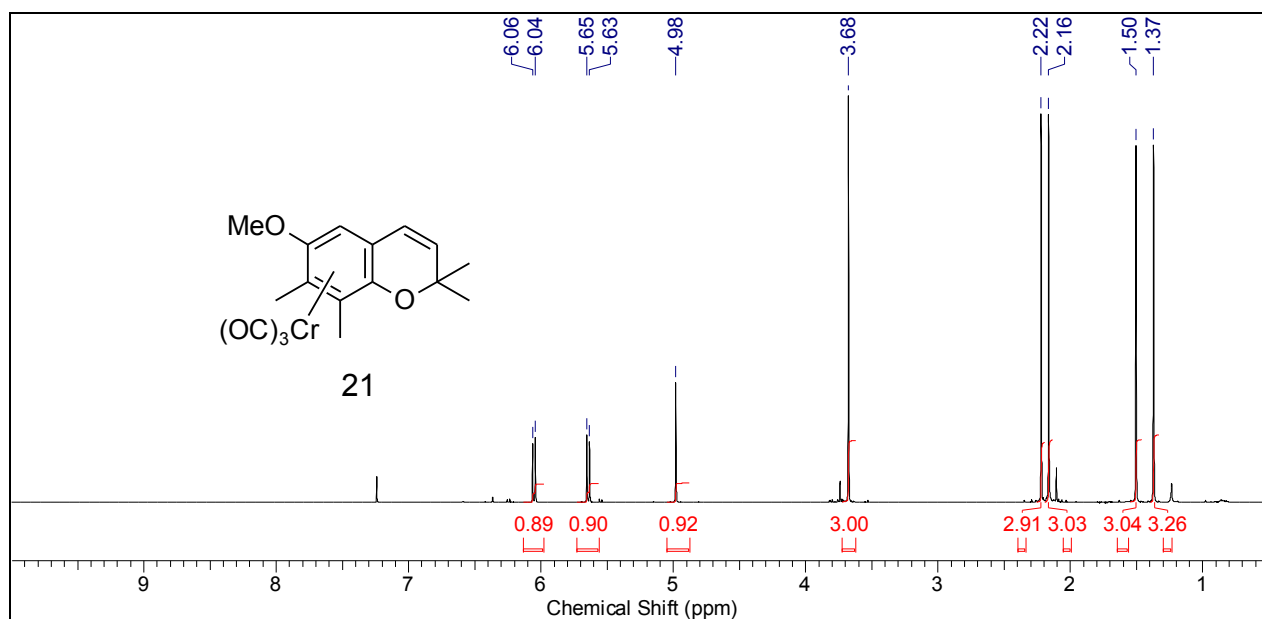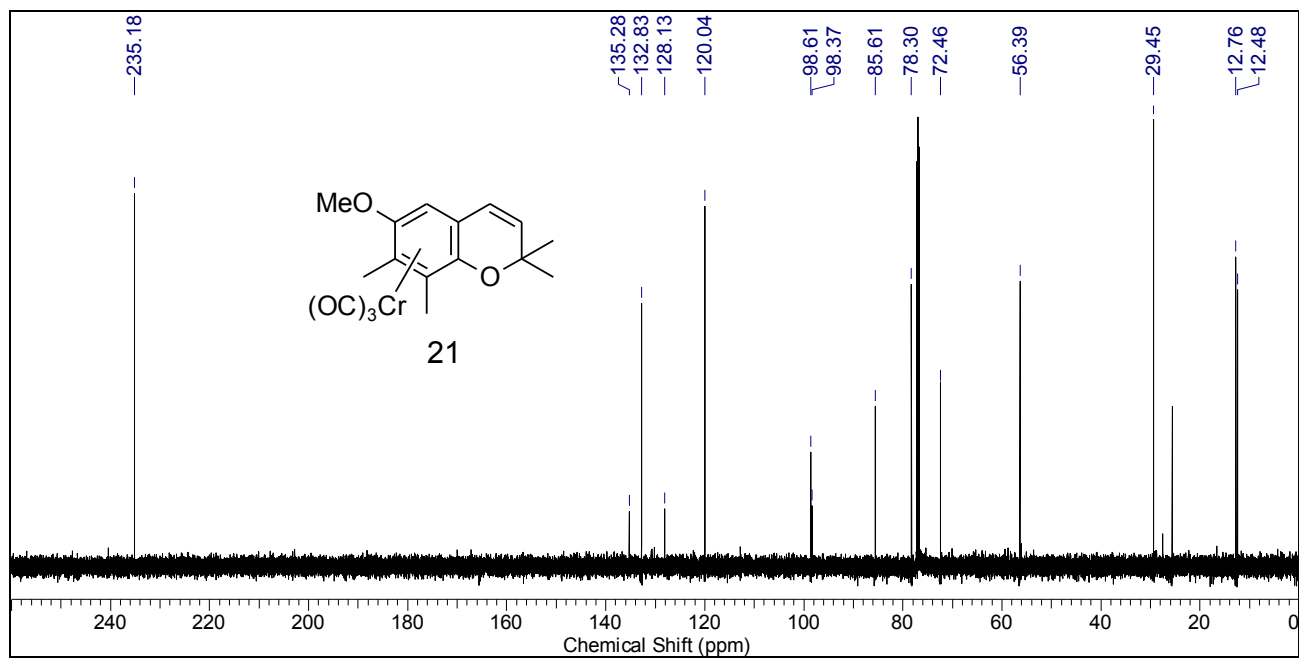

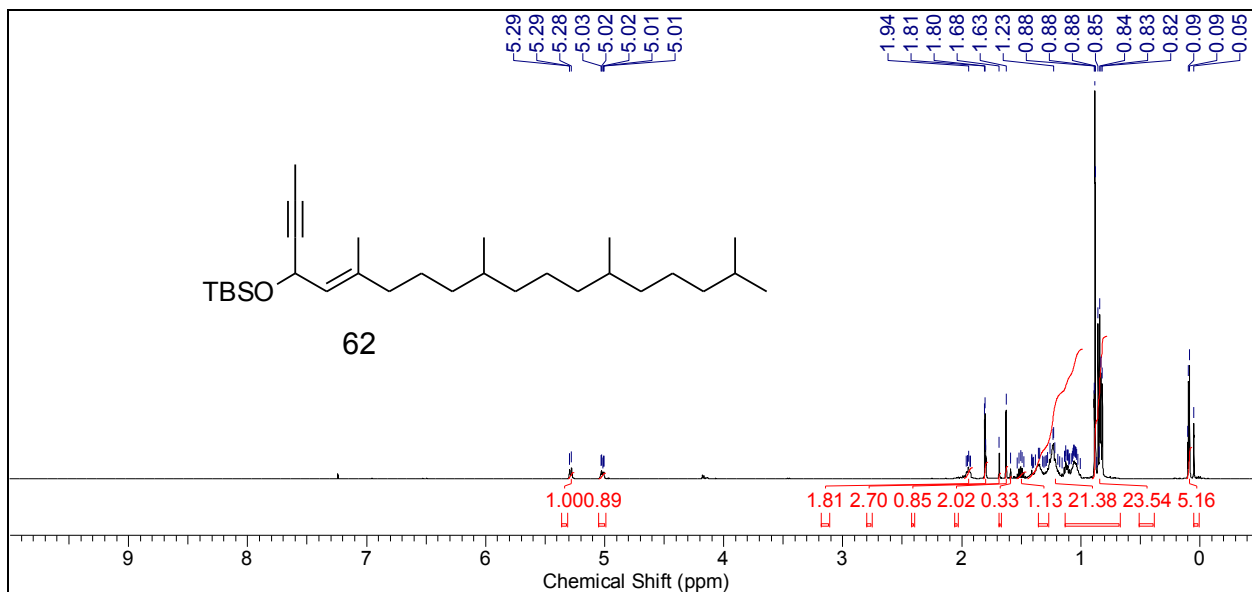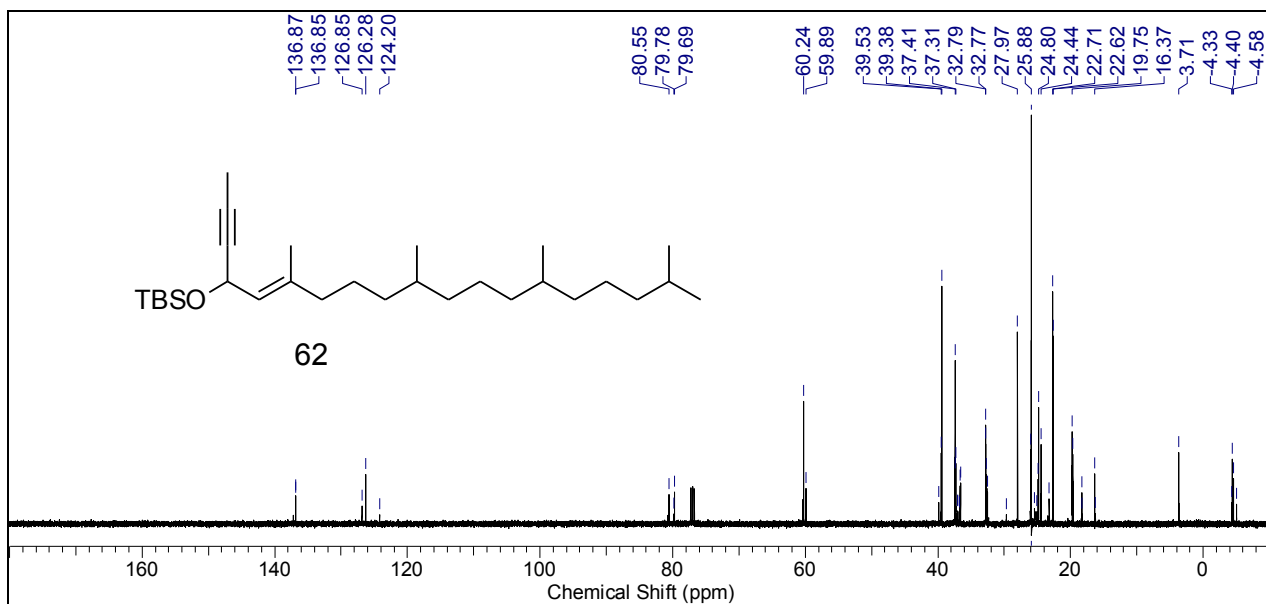

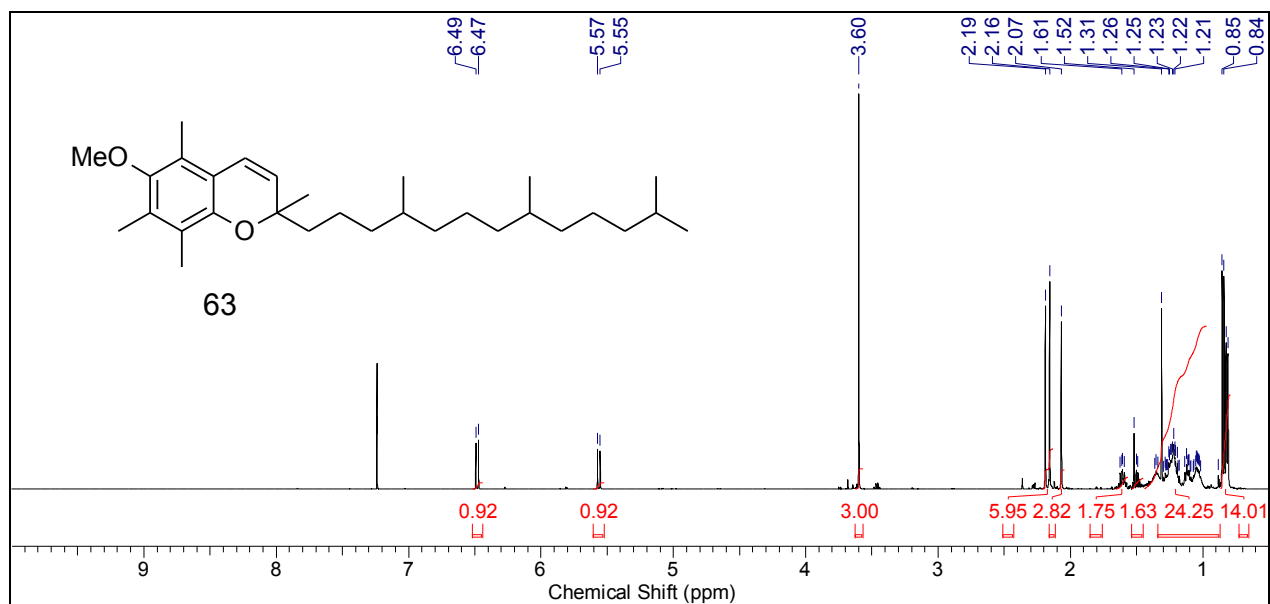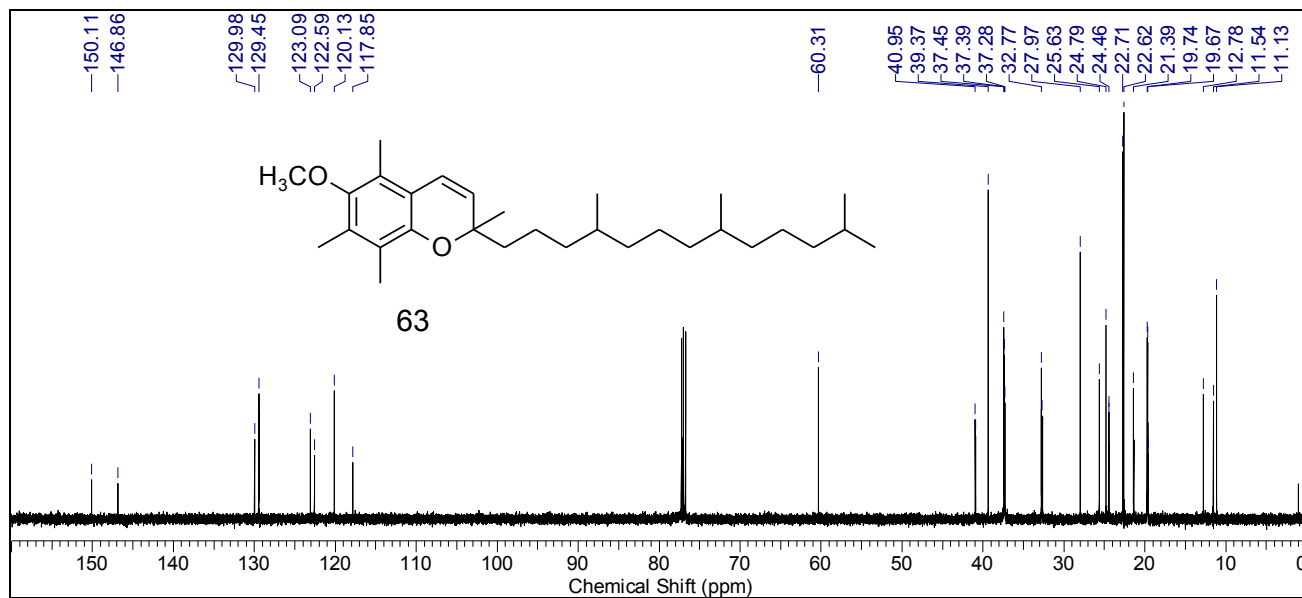

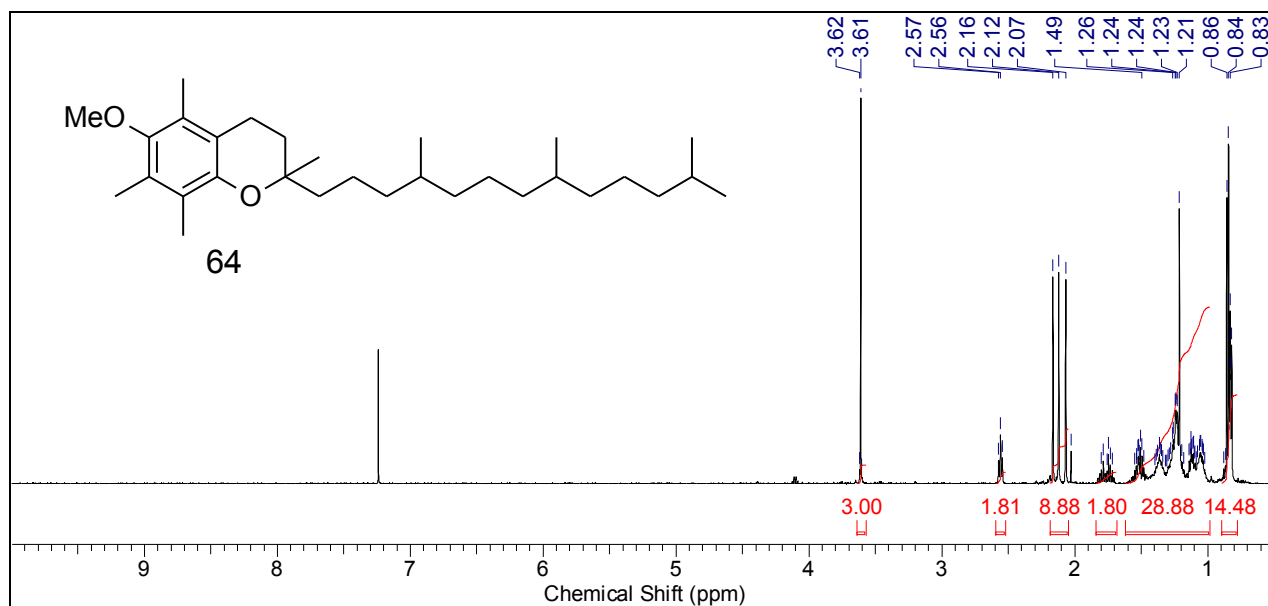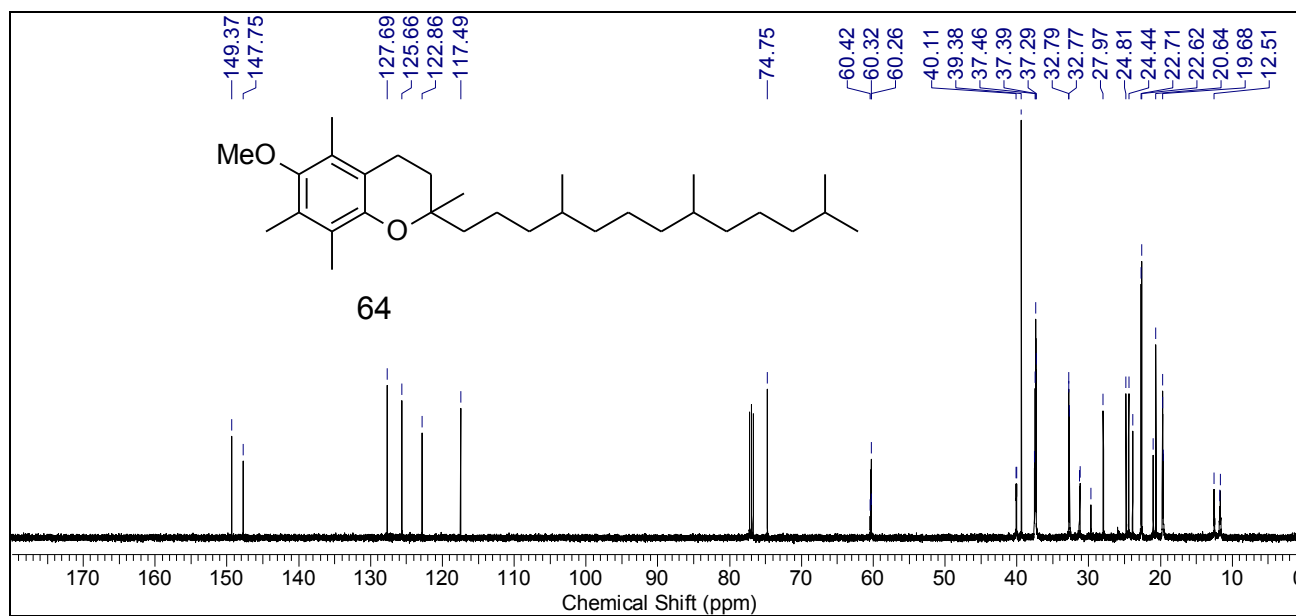



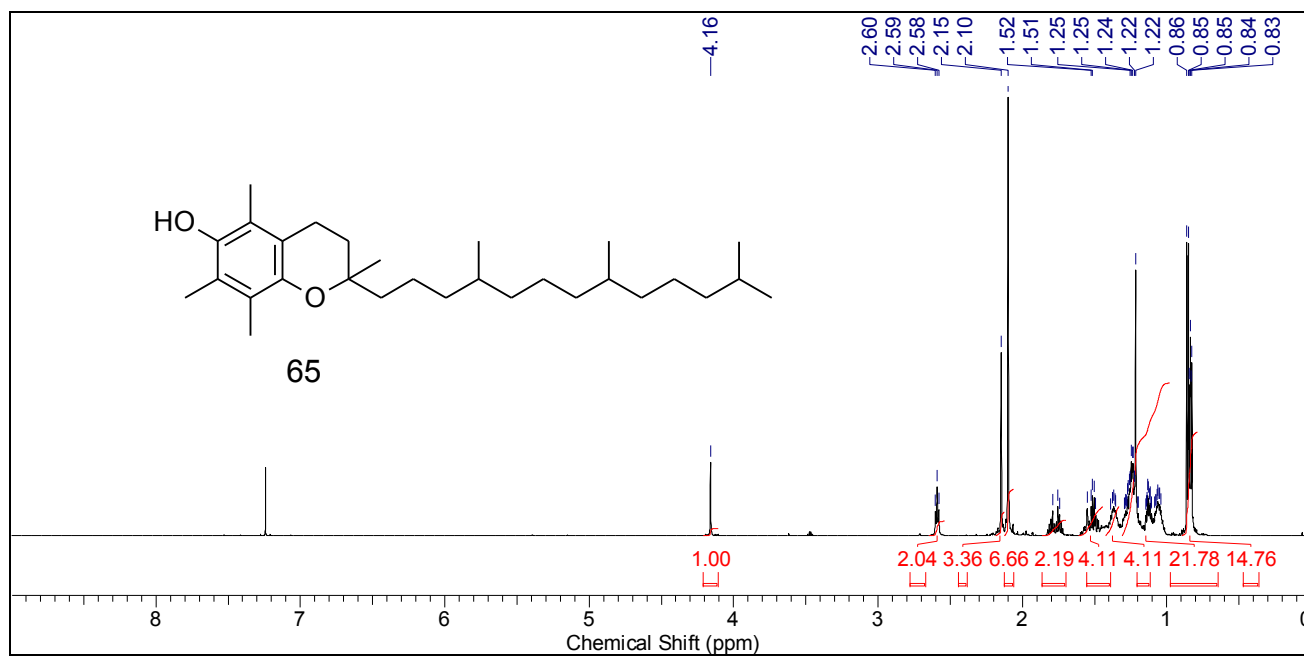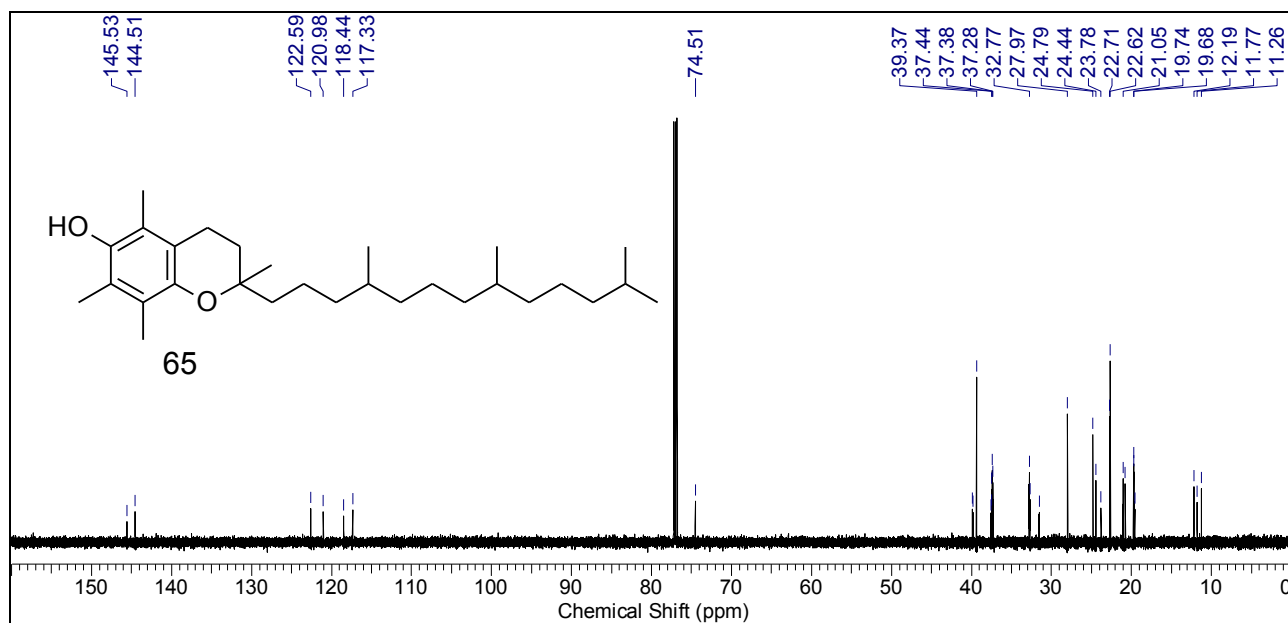

Supplement: NIHMS344727-supplement-2_si_002.pdf [file NIHMS344727-supplement-2_si_002.pdf]
